1  
2  
3  
4  
5  
6  
7  
8  
9  
10  
11  
12  
13  
14  
15  
16  
17  
18  
19  
20  
21  
22  
23

Lactate and glycerol-3-phosphate metabolism cooperatively regulate growth and redox balance during *Drosophila melanogaster* larval development

Hongde Li<sup>1</sup>, Kasun Buddika<sup>1\*</sup>, Maria C. Sterrett<sup>1\*</sup>, Cole R. Julick<sup>2</sup>, Rose C. Pletcher<sup>1</sup>, Chelsea J. Gosney<sup>1</sup>, Anna K. Burton<sup>1</sup>, Jonathan A. Karty<sup>3</sup>, Kristi L. Montooth<sup>2</sup>, Nicholas S. Sokol<sup>1</sup>, and Jason M. Tennessen<sup>1§</sup>

<sup>1</sup>Department of Biology, Indiana University, Bloomington, IN 47405, USA  
<sup>2</sup>School of Biological Sciences, University of Nebraska, Lincoln, NE 68588, USA  
<sup>3</sup>Department of Chemistry, Indiana University, Bloomington, IN, 47405, USA.

\*These authors contributed equally to this work.  
§ Correspondence: [jtenness@indiana.edu](mailto:jtenness@indiana.edu)

Keywords: *Drosophila*, redox balance, aerobic glycolysis, lactate dehydrogenase, glycerol-3-phosphate dehydrogenase

24 **ABSTRACT**

25           The dramatic growth that occurs during *Drosophila* larval development requires rapid  
26 conversion of nutrients into biomass. Many larval tissues respond to these biosynthetic demands  
27 by increasing carbohydrate metabolism and lactate dehydrogenase (dLDH) activity. The resulting  
28 metabolic program is ideally suited to synthesize macromolecules and mimics the manner by  
29 which cancer cells rely on aerobic glycolysis. To explore the potential role of *Drosophila* dLDH  
30 in promoting biosynthesis, we examined how *dLdh* mutations influence larval development. Our  
31 studies unexpectedly found that *dLdh* mutants grow at a normal rate, indicating that dLDH is  
32 dispensable for larval biomass production. However, subsequent metabolomic analyses suggested  
33 that *dLdh* mutants compensate for the inability to produce lactate by generating excess glycerol-  
34 3-phosphate (G3P), the production of which also influences larval redox balance. Consistent with  
35 this possibility, larvae lacking both dLDH and G3P dehydrogenase (GPDH1) exhibit  
36 developmental delays, synthetic lethality, and aberrant carbohydrate metabolism. Considering that  
37 human cells also generate G3P upon Lactate Dehydrogenase A (LDHA) inhibition, our findings  
38 hint at a conserved mechanism in which the coordinate regulation of lactate and G3P synthesis  
39 imparts metabolic robustness upon growing animal tissues.



## 40 INTRODUCTION

41 Nearly a century ago, Otto Warburg observed that tumors exhibit high levels of glucose  
42 consumption coupled to oxygen-independent lactate production (Warburg, 1956). This metabolic  
43 program, which is commonly referred to as the Warburg effect or aerobic glycolysis, has become  
44 a focal point of cancer metabolism research (Vander Heiden et al., 2009). The manner by which  
45 tumors consume glucose and generate lactate, however, is not unique to either cancer cells or  
46 diseased tissue. In fact, the hallmark characteristics of aerobic glycolysis are activated under a  
47 variety of normal developmental conditions, such as during maturation of human T cells (Cooper  
48 et al., 1963; Pearce et al., 2013; Wang et al., 1976), formation of vertebrate somites (Bulusu et al.,  
49 2017; Oginuma et al., 2017), development of muscle tissue (Tixier et al., 2013), activation of hair  
50 follicle stem cells (Flores et al., 2017), and *Drosophila* larval growth (Tennessen et al., 2011).  
51 Moreover, studies of the mitochondrial pyruvate carrier (MPC1) reveal that forcibly shifting  
52 intestinal stem cells towards a more glycolytic state induces over-proliferation in both mice and  
53 flies (Bricker et al., 2012; Schell et al., 2017). Overall, these examples illustrate how the coordinate  
54 regulation of glycolytic flux and lactate metabolism play central roles in biomass production, cell  
55 fate decisions, and developmental growth (Miyazawa and Aulehla, 2018).

56 While the exact reason for why cells activate aerobic glycolysis *in vivo* remains debatable,  
57 one likely explanation revolves around the redox challenges imposed upon highly glycolytic cells  
58 (Vander Heiden et al., 2009). Under conditions of elevated glucose catabolism, glyceraldehyde-3-  
59 phosphate dehydrogenase (GAPDH) transfers electrons to  $\text{NAD}^+$ , resulting in the formation of  
60 NADH. These reducing equivalents must be efficiently removed from NADH because the  
61 resulting decrease in  $\text{NAD}^+$  availability can dampen glycolytic flux and restricts growth. LDH  
62 relieves this redox burden by coupling NADH oxidation to lactate formation, thus ensuring that

63 NAD<sup>+</sup> is regenerated at an adequate rate. Therefore, highly glycolytic cells, whether in diseased  
64 or normal tissues, become reliant on LDH to maintain redox balance. This hypothesis has long  
65 been attractive to the cancer metabolism field because LDH inhibitors could hypothetically  
66 interfere with tumor growth while having lesser impacts on normal tissues (Avi-Dor and Mager,  
67 1956). As a result, much of our understanding regarding how LDH influences biosynthesis,  
68 growth, and cell proliferation is derived from cancer cells studies.

69 The goal of using LDH inhibitors to disrupt tumor growth has a rich history rooted in the  
70 observation that the pyruvate analogs, such as oxamate, inhibit the growth of HeLa cells in  
71 glucose-rich media (Goldberg and Colowick, 1965; Goldberg et al., 1965). More recent analyses  
72 support these early studies, demonstrating that both RNAi knockdown of *LDHA* transcripts and  
73 LDHA inhibitors disrupt cell proliferation in culture and interfere with tumor growth in mouse  
74 xenograft experiments (Billiard et al., 2013; Boudreau et al., 2016; Daniele et al., 2015; Fantin et  
75 al., 2006; Qing et al., 2010). Moreover, a conditional *Ldha* mutation prevents the formation of  
76 *KRAS*- and *EGFR*-induced non-small cell lung cancer in mice, thereby providing *in vivo* evidence  
77 that some tumors require LDHA (Xie et al., 2014).

78 Despite the ability of LDHA inhibitors to disrupt the growth and tumorigenicity of certain  
79 cancer cells, a growing body of evidence suggests that animal cells can compensate for the loss of  
80 LDHA activity. Pancreatic cancer cell lines can become resistant to the LDHA inhibitor GNE-140  
81 by increasing oxidative phosphorylation (OXPHOS) (Boudreau et al., 2016). Similarly, human  
82 colon adenocarcinoma and murine melanoma cell lines that lack both LDHA and LDHB increase  
83 OXPHOS and are capable of forming tumors in xenograft experiments (Zdravlevic et al., 2018).  
84 However, the most significant evidence that cellular metabolism readily adapts to the loss of LDH  
85 activity is not based on cancer studies, but instead stems from a rare inborn error of metabolism

86 known as glycogen storage disease Type XI (GSD-XI), which results from loss-of-function  
87 mutations in the human *LDHA* gene (Maekawa et al., 1990). Other than reports of skin lesions and  
88 symptoms associated with exercise intolerance (Kanno et al., 1980; Yoshikuni et al., 1986), GSD-  
89 XI patients develop and grow normally (Kanno et al., 1988) which is surprising given the role of  
90 LDHA in several developmental and physiological processes. The mild symptoms experienced by  
91 GSD-XI patients not only raise the possibility that LDH inhibitors might be ineffective in a clinical  
92 setting, but also suggest that studies of animal development can identify the metabolic mechanisms  
93 that function redundantly with LDH. Toward this goal, we examined the metabolic consequences  
94 of mutating *dLdh* (FBgn0001258) in the fruit fly *Drosophila melanogaster*.

95         Similar to cancer cells, *Drosophila* larvae increase glycolytic metabolism and dLDH  
96 activity as a means of supporting the ~200-fold increase in body mass that occurs during this  
97 developmental stage (Graveley et al., 2011; Li et al., 2013; Rechsteiner, 1970; Tennessen et al.,  
98 2011; Tennessen et al., 2014b). To determine if this increase in dLDH activity is necessary to  
99 maintain redox balance and promote biomass accumulation, we examined how *dLdh* mutations  
100 influence larval development. We found that although *dLdh* mutants exhibit a decreased  
101 NAD<sup>+</sup>/NADH ratio, this metabolic insult had no noticeable effect on either growth rate or biomass  
102 accumulation. Instead, metabolomic analysis revealed that *dLdh* mutants up-regulate G3P  
103 production, which also promotes NAD<sup>+</sup> regeneration and potentially supports larval growth  
104 despite loss of dLDH activity. We observed a similar result in *Gpdh1* (FBgn0001128) mutants,  
105 which develop normally despite a decreased NAD<sup>+</sup>/NADH ratio. Larvae that lack both dLDH and  
106 GPDH1, however, exhibit severe growth defects, developmental delays, and synthetic lethality,  
107 thus demonstrating that these two enzymes cooperatively support larval growth. Considering that  
108 both cancer cells lines and humans GSD-XI patients also increase G3P production in response to

109 the loss of LDH-A (Billiard et al., 2013; Boudreau et al., 2016; Miyajima et al., 1995), our findings  
110 suggest that fundamental aspects of this metabolic relationship are similar in both flies and  
111 humans.

112

## 113 MATERIALS AND METHODS

### 114 *Drosophila* husbandry and genetic analysis

115 Fly stocks were maintained at 25°C on Bloomington *Drosophila* Stock Center (BDSC)  
116 food. Larvae were raised and collected as previously described (Li and Tennessen, 2017). Briefly,  
117 50 adult virgin females and 25 males were placed into a mating bottle and embryos were collected  
118 for four hours on a 35 mm molasses agar plate with a smear of yeast on the surface. Collection  
119 plates were stored inside of an empty 60 mm plastic plate and placed in a 25°C incubator for 60  
120 hours. All mutations and transgenes were studied in a *w<sup>1118</sup>* background. *Gpdh1* and *dLdh*  
121 mutations were maintained in trans to the balancer chromosomes *CyO*, *p{GAL4-twi.G}*, *p{UAS-*  
122 *2xEGFP}* (BDSC Stock 6662) and *TM3*, *p{Dfd-GMR-nvYFP}*, *Sb<sup>1</sup>* (BDSC Stock 23231),  
123 respectively. Unless noted, *dLdh* mutant larvae harbored a trans-heterozygous combination of  
124 *Ldh<sup>16</sup>* and *Ldh<sup>17</sup>* (*Ldh<sup>16/17</sup>*) and a *dLdh* precise excision control strain (*dLdh<sup>prec</sup>*) were used in all  
125 experiments (for a description of these alleles, see Li et al., 2017). *dLdh* mutant phenotypes were  
126 rescued using the previously describe transgene *{pdLdh}* (Li et al., 2017). RNAi experiments were  
127 conducted using transgenes that target either *dLdh* (BDSC stock 33640) or GFP (BDSC stock  
128 41556).

129

### 130 Generation of *Gpdh1* mutations

131 *Gpdh1* mutations were generated using a CRISPR/Cas9 approach (Gratz et al., 2013; Sebo  
132 et al., 2014). Two oligos encoding guide RNA sequences that targeted either exon 3 (5'-  
133 GGCTTCGACAAGGCCGAGGG -3') or exon 4 (5'- GATCTGATCACGACGTGTTA -3') were  
134 inserted into the BbsI site of pU6-BbsI-gRNA (Addgene). Each gRNA construct was  
135 independently injected into BDSC Stock 52669 (*y<sup>1</sup> M{vas-Cas9.S}ZH-2A w<sup>1118</sup>*) by Rainbow

136 Transgenic Flies (Camarillo, CA). The mutations *Gpdh*<sup>A10</sup> (19 bp deletion within exon 3; 5'-  
137 TCGACAAGGCCGAGGGCGG-3') and *Gpdh*<sup>B18</sup> (7 bp deletion with exon 4; 5'-ACGTGTT-3')  
138 were isolated using a PCR-based sequencing approach. All experiments described herein used a  
139 trans-heterozygous combination of these two alleles (*Gpdh*<sup>A10/B18</sup>).

140

#### 141 **Generation of the *UAS-Gpdh1* transgene**

142 The *UAS-Gpdh1* transgenic strain was generated by PCR amplifying the *Gpdh1* cDNA from  
143 *Drosophila* Genomics Resource Center (DGRC) cDNA clone FI03663 using the oligos 5'-  
144 AGAATTCATGGCGGATAAAGTAAAT-3' and 5'-  
145 AGCGGCCGCTTAAAGTTTTGGCGACGG-3'. The *Gpdh1* PCR product was inserted into the  
146 EcoRI and NotI sites of pUAST-attB (DGRC) and the resulting plasmid was injected into BDSC  
147 Stock 24867 (*M{vas-int.Dm}ZH-2A, PBac{y[+]-attP-3B}VK00031*) by Rainbow Transgenic Flies  
148 (Camarillo, CA).

149

#### 150 **Gas Chromatography-Mass Spectrometry (GC-MS) analysis**

151 *dLdh* mutants and precise excision controls were analyzed using four independent targeted  
152 GC-MS-based metabolomic analyses. Samples were collected, processed and analyzed at either  
153 the University of Utah metabolomics core facility or the Indiana University Mass Spectrometry  
154 Facility as previously described (Cox et al., 2017; Li and Tennessen, 2018). Each sample contained  
155 25 mid-L2 larvae. For all experiments, six biological replicates were analyzed per genotype. GC-  
156 MS data was normalized based on sample mass and in internal succinic-d4 acid standard. Each  
157 experiment was statistically analyzed using Metaboanalyst (metaboanalyst.ca) version 4.0 with  
158 Pareto scaling (Chong et al., 2018).

159

## 160 **Liquid Chromatography-Mass Spectrometry (LC-MS/MS) analysis**

161 For both *dLdh* mutants and precise excision controls, 100 mid-L2 larvae were  
162 collected in a 1.5 mL microfuge tube. Each sample was immediately washed three times using ice-  
163 cold PBS, all wash solution was removed, and the sample tube was drop frozen in liquid nitrogen.  
164 Metabolite extraction and LC-MS analysis was performed by the University of Utah Metabolomics  
165 core facility as previously described (Bricker et al., 2012; Cox et al., 2017). Data was analyzed  
166 using a two-tailed student t-test.

167

## 168 **Colorimetric metabolite assays**

169 Glycogen, triglyceride (TAG), trehalose, and soluble protein were measured in mid-L2  
170 larvae using previously described methods (Tennessen et al., 2014a). Briefly, 25 mid-L2 larvae  
171 were collected from the surface of a molasses egg-laying cap that contained ~1.5 grams of yeast  
172 paste and placed in a 1.5 mL microfuge tube. For each assay, at least six biological replicates were  
173 collected from independent mating bottles. Samples were washed three times using ice-cold  
174 phosphate buffered saline (PBS; pH 7.4). All PBS was removed from the samples and larvae were  
175 homogenized in the appropriate assay buffer. 10  $\mu$ L of larval homogenate was removed for  
176 measuring soluble protein using a Bradford assay and the remaining homogenate was immediately  
177 heat-treated at 70°C for 5 minutes. Heat-treated samples were frozen at -80°C until analyzed using  
178 the appropriate assay.

179 NAD<sup>+</sup> and NADH were measured using the Amplitude fluorimetric NAD<sup>+</sup>/NADH ratio assay  
180 kit (AAT Bioquest, Inc; 15263) according to instructions. Ten mid-second instar (L2) larvae were  
181 washed with cold PBS and homogenized with 100  $\mu$ L of the lysis buffer. The lysates were

182 centrifuged for 10 min at 3000 g, and the supernatants were collected for the analysis. Fluorescence  
183 was monitored with a Cytation 3 plate reader (BioTek) at Ex/Em=540/590 nm. The concentrations  
184 of NAD<sup>+</sup> and NADH were normalized to the soluble protein concentrations.

185 All metabolite measurements were repeated a minimum of three times with six independent  
186 samples analyzed per genotype. Data was analyzed using a two-tailed student t-test.

187

### 188 **<sup>13</sup>C-based metabolic turnover rate analysis**

189 For measurement of metabolic turnover rates from glucose to lactate and glycerol-3-  
190 phosphate, mid-L2 larvae were fed with Semi-defined Medium (Backhaus et al., 1984) containing  
191 25% D-glucose-<sup>13</sup>C<sub>6</sub> for 2 hours, then metabolites were detected using an Agilent 6890N Gas  
192 Chromatograph with a 5973 Inert Mass Selective Detector and Gerstel MPS2 autosampler. The  
193 isotopologue distributions were corrected based on the natural abundance of elements. The  
194 metabolic turnover rate  $f_x$  was estimated based on the formula  $X^L/X^T = p(1 - \exp(-f_x * t/X^T))$ , where  $X^L$   
195 is the amount of <sup>13</sup>C labeled metabolite (m+3),  $X^T$  is the amount of total metabolite pool,  $p$  is the  
196 percentage of glucose-<sup>13</sup>C<sub>6</sub>.

197

### 198 **Graphical Representation of Metabolite Data**

199 All figures were generated using Graphpad Prism 7.0 (version 7.0c). Metabolomic data are  
200 presented as box plots, with the box extending from the 25<sup>th</sup> to 75<sup>th</sup> percentile, the line in the middle  
201 representing the median value.

202

### 203 **Quantification of Mitochondrial Genome Copy Number**



204 Quantitative PCR was used to measure relative ratio of mitochondrial DNA/genomic DNA  
205 in precise excision controls and *dLdh* mutants based on a previously described strategy (Oliveira  
206 and Kaguni, 2011). Total DNA was isolated from 25 mid-L2 larvae using the Qiagen Core Gene  
207 2 extraction kit. For mitochondrial DNA measurements, DNA samples were diluted 1:100 and the  
208 *Drosophila* mitochondrial gene *mt:CoI* was amplified using the oligos 5'-  
209 TGCTCCTGATATAGCATTCCCACGA-3' and 5'-TCCACCATGAGCAATTCCAGCGG-3'.  
210 The relative abundance of genomic DNA in the samples was measured by amplifying the *Rpl*  
211 32 genomic locus using oligos 5'-AGGCCCAAGATCGTGAAGAA-3' and 5'-  
212 TGTGCACCAGGAACTTCTTGAA-3'.

213

#### 214 **Larval Respiration Studies**

215 We quantified routine metabolic rate in precise excision controls and *dLdh* mutants as  
216 CO<sub>2</sub> production using established flow-through respirometry protocols for larval *D.*  
217 *melanogaster* (Hoekstra and Montooth, 2013; Hoekstra et al., 2013). We measured metabolic  
218 rate for twenty biological replicates per genotype. Each biological replicate consisted of ten mid-  
219 L2 larvae that were placed in a small cap containing 0.5 mL of fly food inside of a glass  
220 respirometry chamber. The amount of CO<sub>2</sub> produced by the group of larvae was measured by  
221 flowing CO<sub>2</sub>-free air through the chambers at a rate of 100 ml/min and measuring the CO<sub>2</sub>  
222 produced as a result of metabolism using an infrared CO<sub>2</sub> analyzer (Li-Cor 7000 CO<sub>2</sub>/H<sub>2</sub>O  
223 Analyzer; LI-COR, Lincoln, NE). Each run of the respirometer used a multiplexed system (Sable  
224 Systems International, Henderson, NV) to cycle through four chambers that contained larvae and  
225 a fifth baseline chamber that were all housed in a thermal cabinet maintained at 26°C (Tritech™  
226 Research, Los Angeles, CA). Genotypes were randomly assigned to chambers within each run.

227 Within each run, two technical replicate measurements were performed for each group of larvae.  
228 Technical replicate measures were strongly correlated ( $r = 0.935$ ). We calculated  $VCO_2$  as the  
229 average rate of  $CO_2$  produced across the 10 min. time interval for the first replicate measure in  
230 each run for each biological sample after correcting for any minimal drift in the baseline signal.  
231 Each group of larvae was massed using a Cubis® microbalance (Sartorius AG, Göttingen,  
232 Germany) before being placed in the respirometer. This allowed us to statistically account for the  
233 relationship between mass and metabolic rate when testing for differences between genotypes  
234 using a Type II Model regression implemented with smatR (Warton et al., 2006) in the R  
235 statistical package (Team, 2017). There was no significant difference between genotypes in the  
236 slope relating  $\log(\text{mass})$  and  $\log(\text{metabolic rate})$  (i.e., the mass-scaling exponent) ( $P = 0.099$ ); we  
237 then tested whether genotypes differed in metabolic rate across masses (i.e., for a difference in  
238 the y intercept of the relationship between mass and metabolic rate).

239

#### 240 **Larval central nervous system (CNS) and gastrointestinal (GI) tract staining**

241 CNS and intestine dissection and analysis were performed as previously described (Luhur et al.,  
242 2017; Luhur et al., 2014). Briefly, size- and age-synchronized larval CNSs and larval intestines  
243 were dissected in ice cold 1XPBS and fixed at room temperature for 45 minutes in 4%  
244 paraformaldehyde (Electron Microscopy Services) in 1X PBS with and without 0.3% Triton X-  
245 100, respectively. For Dpn staining, CNSs were subsequently washed with 0.3% PBT and  
246 blocked (1XPBS, 0.5% BSA) for at least 1 hour at room temperature. Primary antibody staining  
247 was performed with guinea pig anti-Dpn (provided by James Skeath, 1:500) for 5 hours at room  
248 temperature. Secondary antibody staining was performed overnight with AlexaFlour-488  
249 conjugated goat anti-guinea pig antibodies (Life Technologies, 1:1000) and DAPI (0.5  $\mu\text{g/ml}$ ) at

250 4°C. Larval intestines were washed with 0.1% PBT and incubated with DAPI for 15 minutes.

251 Following these secondary washes, CNSs and intestines were mounted in Vectashield mounting  
252 medium (Vector Laboratories).

253 For EdU staining, dissected larval CNSs were immediately incubated in Grace's insect  
254 media supplemented with 1mM EdU. Subsequent manipulations were performed as described in  
255 the product manual (ThermoFisher C10338).

256 For quantifications, multiple Z-steps of individual brain lobes or posterior midguts were  
257 acquired using the Leica SP5 confocal microscope in the Light Microscopy Imaging Center at  
258 Indiana University, Bloomington. The maximum projection of each Z-stack was generated using  
259 FIJI. Dpn and EdU positive cell numbers were manually counted using Adobe Photoshop. The  
260 area of larval enterocyte nuclei was measured using FIJI.

261

## 262 RESULTS

### 263 dLDH maintains larval NAD<sup>+</sup> redox balance

264 To understand how lactate synthesis influences *Drosophila* larval metabolism, we used  
265 LC-MS/MS to measure the NAD<sup>+</sup>/NADH ratio in larvae harboring a *trans-heterozygous*  
266 combination of the previously described *dLdh* loss of function alleles, *dLdh*<sup>16</sup> and *dLdh*<sup>17</sup>, as well  
267 as a precise-excision control strain, *dLdh*<sup>prec</sup> (Li et al., 2017). Consistent with a model in which  
268 dLDH regulates larval redox balance, our analysis revealed that *dLdh*<sup>16/17</sup> mutant larvae exhibit a  
269 decreased NAD<sup>+</sup>/NADH ratio (Figure 1A; Supplemental Table 1). In contrast, the ratios of  
270 NADP<sup>+</sup>/NADPH, reduced glutathione/oxidized glutathione (GSSG/GSH), and ADP/ATP were  
271 similar in both mutant and control larvae (Figure 1A; Supplemental Table 1). The abundance of  
272 AMP relative to ATP, however, was slightly elevated in *dLdh* mutants (Figure 1B; Supplemental  
273 Table 1). Overall, our results demonstrate that loss of dLDH activity interferes with the  
274 NAD<sup>+</sup>/NADH balance of larvae raised under standard culture conditions but has minimal effects  
275 on other aspects of redox metabolism and energy production.

276 Despite the fact that redox balance is significantly altered in *Ldh* mutants, the phenotypic  
277 consequences of this metabolic disruption are mild. We previously demonstrated that *dLdh* mutant  
278 larvae raised under ideal culture conditions can grow at a normal rate for much of larval  
279 development (Li et al., 2017). Furthermore, *dLdh* mutants that survive the mid-L3 lethal phase  
280 develop into adults (Li et al., 2017). To determine if any other biosynthetic processes are disrupted  
281 in *dLdh* mutants, we quantified the major larval pools of stored energy. Our analysis revealed that  
282 loss of dLDH activity has no effect on either triglyceride or trehalose levels (Figure 1C).  
283 Meanwhile, glycogen levels exhibited a modest, but significant increase in *dLdh* mutants when  
284 compared with control larvae (Figure 1C). This later observation was notable because the

285 epidermis of human GSD-XI patients also appear to accumulate excess glycogen (Yoshikuni et  
286 al., 1986), indicating that *dLdh* mutants phenocopy the subtle metabolic defects observed in  
287 humans lacking LDHA.

288

### 289 **G3P levels are elevated in *dLdh* mutants**

290 The ability of *dLdh* mutants grow at a normal rate suggests that *Drosophila* development  
291 adapts to the loss of dLDH activity. In this regard, human cell culture studies suggest that LDH-A  
292 inhibition can increase flux from glycolysis into the tricarboxylic acid cycle (TCA cycle) (Billiard  
293 et al., 2013; Xie et al., 2014). We found no evidence, however, that this metabolic shift occurs in  
294 flies, as *dLdh* mutant and control larvae produced CO<sub>2</sub> at similar rates (Figure 1D). Furthermore,  
295 mitochondrial DNA content was unchanged in *Ldh* mutants (Supplemental Figure 1A), suggesting  
296 that loss of dLDH activity does not induce excess mitochondrial proliferation. Since our initial  
297 metabolic characterization failed to provide an adequate explanation for how larvae compensate  
298 for the loss of LDH, we turned to an untargeted metabolomics approach to poll a larger pool of  
299 analytes. Four independent GC-MS-based studies revealed that *dLdh*<sup>16/17</sup> mutants exhibit  
300 reproducible changes in only four metabolites: lactate, pyruvate, 2-hydroxyglutarate (2HG), and  
301 G3P (Figure 2A-B, Supplemental Tables 2-6). Since previous studies have already examined the  
302 relationship between dLDH and the metabolites lactate, pyruvate, and 2HG levels (Li et al., 2017),  
303 we focused our efforts on understanding why the G3P pool size was increased in *dLdh* mutants.  
304 To confirm that *dLdh* mutants accumulate excess G3P as the result of decreased dLDH activity,  
305 we demonstrated that expression of an *dLdh* transgene (*p{dLdh}*) in *dLdh* mutant larvae can restore  
306 G3P levels to those observed in *dLdh*<sup>prec</sup> control larvae (Figure 2C). Similarly, ubiquitous  
307 expression of a *UAS-dLdh-RNAi* (*dLdh*<sup>i</sup>) transgene induced elevated G3P levels (Figure 2D), thus

308 confirming that *Drosophila* larvae accumulate excess G3P in response to the loss of dLDH activity.  
309 Considering that G3P levels are elevated in both GSD-XI patients and pancreatic cancer cells  
310 exposed to an LDH inhibitor ((Billiard et al., 2013; Boudreau et al., 2016; Miyajima et al., 1995)),  
311 our findings suggest that both flies and humans accumulate G3P to compensate for the loss of  
312 LDH activity.

313

### 314 **GPDH1 regulates larval NAD<sup>+</sup>/NADH redox balance**

315 Since GPDH1 couples G3P synthesis to NADH oxidation, increased G3P production could  
316 provide *dLdh* mutants with an alternative means of regenerating NAD<sup>+</sup> (Figure 3A). Moreover,  
317 GPDH1 is a highly abundant protein in *Drosophila* larvae and could itself represent a key regulator  
318 of larval redox balance. To test these possibilities, we generated two *Gpdh1* loss-of-function  
319 alleles, *Gpdh1<sup>A10</sup>* and *Gpdh1<sup>B18</sup>*, both of which represent frameshift mutations that either delete or  
320 truncate the C-terminal catalytic domain, which is required for GPDH1 enzyme activity  
321 (Supplemental Figure 2A-B). Larvae that harbor a *trans*-heterozygous combination of these  
322 alleles, *Gpdh1<sup>A10/B18</sup>*, exhibited significantly lower G3P levels compared to controls (Figure 3B).  
323 Furthermore, ubiquitous expression of a *UAS-Gpdh1* transgene restored normal G3P levels in  
324 mutant larvae (Figure 3B), confirming that the loss of zygotic GPDH1 reduces G3P synthesis.

325 To determine if G3P production influences larval redox balance, we measured both NAD<sup>+</sup>  
326 and NADH levels in *Gpdh1* mutants. Similar to *dLdh* mutants, we observed that the NAD<sup>+</sup>/NADH  
327 ratio in mid-L2 larvae was significantly lower in *Gpdh1* mutants as compared with a *Gpdh1<sup>A10/+</sup>*  
328 heterozygous control (Figure 3C). We also examined the extent to which GPDH1 influences NAD<sup>+</sup>  
329 levels by feeding D-glucose-<sup>13</sup>C<sub>6</sub> to mid-L2 larvae and measuring the rate of lactate and G3P  
330 synthesis. Since both dLDH and GPDH1 must oxidize one molecule of NADH in order to form

331 one molecule of either lactate or G3P respectively (Figure 3A), we can indirectly infer the rate at  
332 which each enzyme regenerates  $\text{NAD}^+$  based on synthesis of these metabolites. Our analysis  
333 revealed that mid-L2 larvae synthesize m+3 lactate and m+3 G3P at similar rates (Figure 3D),  
334 indicating that GPDH1 and dLDH regenerate roughly equivalent amounts of  $\text{NAD}^+$  during larval  
335 development.

336 Our observation that *Gpdh1* mutants exhibit a decreased  $\text{NAD}^+/\text{NADH}$  ratio balance also  
337 implicates this enzyme in coordinating redox balance with larval energy production. G3P  
338 synthesized in the cytoplasm can be oxidized on the inner mitochondrial membrane by the FAD  
339 dependent enzyme Glycerophosphate oxidase 1 (Gpo-1; FBgn0022160) to generate ATP via  
340 oxidative phosphorylation (O'Brien and MacIntyre, 1972). Therefore, any decrease in G3P  
341 synthesis could also reduce ATP production. Consistent with this function, ATP levels were  
342 significantly decreased in *Gpdh1* mutants when compared with controls (Figure 3E). Yet, despite  
343 the role for GPDH1 in these critical metabolic processes, animals lacking zygotic GPDH1 activity  
344 exhibit only mild developmental defects. In agreement with previous reports (Bewley and  
345 Lucchesi, 1977), we found that *Gpdh1* mutants are viable through larval development and are  
346 ~15% smaller at the L2-L3 molt (Figure 3F and Supplemental Figure 2C), a result which again  
347 demonstrates how larval development is robust and can compensate for significant metabolic  
348 insults.

349

### 350 ***Gpdh1*; *dLdh* double mutants exhibit severe developmental delays and a synthetic lethal** 351 **phenotype**

352 Since dLDH and GPDH1 individually control larval redox balance, we tested the  
353 possibility that simultaneous removal of both enzymes would induce growth defects. Indeed, when

354 compared with *Gpdh1* and *dLdh* single mutants, *Gpdh1; dLdh* double mutants are 85% smaller  
355 and experience developmental delays (Figure 4A-C). Moreover, *Gpdh1; dLdh* double mutants die  
356 throughout L1 and L2 development, with ~30% of double mutant larvae dying during L1  
357 development and all animals failing to complete the L2-L3 molt (n>100; Figure 4C). To further  
358 characterize these growth defects in double mutant larvae, we examined the larval brain, which  
359 was previously reported to display high levels of both dLDH and GPDH1 activity (Rechsteiner,  
360 1970). *w<sup>1118</sup>* controls, *Gpdh1* and *dLdh* single mutants, and *Gpdh1; dLdh* double mutants were  
361 collected 60 hours after egg-laying and the brains were fixed and stained with DAPI, to visualize  
362 overall tissue size, and for Deadpan (Dpn), to visualize neuroblasts (Figure 4D-H). While the  
363 brains of single mutant larvae exhibited no growth defects, the brains of *Gpdh1; dLdh* double  
364 mutants were significantly smaller than controls (Figure 4D-G). However, if *Gpdh1; dLdh* double  
365 mutants were allowed to develop for an additional 24 hours, the brain grew to a comparable size  
366 as the *w<sup>1118</sup>* control (Figure 4D,H). We observed a similar phenomenon in the larval intestine,  
367 where the posterior midgut of age-matched *Gpdh1; dLdh* mutant larvae was shorter than either  
368 single mutant, contained significantly smaller enterocyte nuclei, and exhibited a growth delay of  
369 approximately 24 hours when compared with single mutant controls (Supplemental Figure 3). To  
370 determine if these growth phenotypes are associated with a decreased rate of cell cycle progression,  
371 we dissected brains from size-matched larvae and incubated them in an organ culture media with  
372 EdU for 2 hours. When compared with *w<sup>1118</sup>* controls, *dLdh* single mutants, and *Gpdh1* single  
373 mutants, the number of cells that stain with EdU was significantly decreased in *Gpdh1; dLdh*  
374 mutant brains (Figure 5A-E). Overall, these results demonstrate that while larval development can  
375 compensate for the loss of either dLDH or GPDH1, removal of both enzymes severely restricts  
376 tissue growth.



377

378 **Simultaneous loss of dLDH and GPDH1 induces defects in carbohydrate and amino acid**  
379 **metabolism**

380 Since our metabolic studies suggested that dLDH and GPDH1 maintain the larval  
381 NAD<sup>+</sup>/NADH ratio, we next examined the possibility that the *Gpdh1*; *dLdh* double mutant growth  
382 phenotypes stem from a severe disruption of redox balance. These experiments revealed, however,  
383 that the ratio of NAD<sup>+</sup> to NADH was similar in control and double mutant larvae (Figure 6A). To  
384 further investigate this unexpected result, we used a targeted GC-MS-based approach to analyze  
385 central carbon metabolism of both *Gpdh1* single mutants and *Gpdh1*; *dLdh* double mutants (Figure  
386 6B-D; Supplemental Tables 7 and 8). In the case of the *Gpdh1* mutant larvae, metabolomic analysis  
387 revealed a significant disruption of amino acid metabolism. Not only were aspartate and several  
388 essential amino acids decreased, but we also observed elevated levels of urea and the urea cycle  
389 intermediate ornithine (Figure 5B-D), suggesting that loss of GPDH1 results in elevated amino  
390 acid catabolism. Moreover, our analysis also uncovered elevated glutamate and proline levels.  
391 Considering that insects can synthesize proline in a NADH dependent manner (McCabe and  
392 Bursell, 1975), this finding hints at a mechanism by which loss of G3P production induces elevated  
393 proline synthesis in response to aberrant redox balance. Intriguingly, *Gpdh1* mutants do not exhibit  
394 an increase in either lactate or 2HG levels (Figure 6B,C) – a result which would support the inverse  
395 correlation between GPDH1 and dLDH activity. This null result, however, could indicate that  
396 dLDH activity is saturated in developing larvae. Finally, xanthine and urate levels, which are  
397 produced by purine catabolism, were also increased in *Gpdh1* mutants (Figure 6B; Supplemental  
398 Figure 4A).

399            Nearly all of the metabolic changes observed in the *Gpdh1* single mutant were enhanced  
400            in the *Gpdh1; dLdh* double mutants (Figure 6B,D). For example, *Gpdh1; dLdh* mutant larvae  
401            exhibited a 500-fold increase in xanthine levels when compare to the heterozygous controls (Figure  
402            6B; Supplemental Figure 4B), suggesting a severe disruption of purine metabolism. Overall, the  
403            metabolic changes observed in the double mutant represented the combined metabolic disruptions  
404            seen in the single mutants (Figure 6B-D), but with two major exceptions – the relative abundance  
405            of both trehalose and glucose were significantly elevated in *Gpdh1; dLdh* mutant larvae (Figure  
406            6B,D). This result is important as it suggests that the loss of both enzymes lead to decreased  
407            glycolytic flux. Since an inhibition of glucose catabolism would result in decreased NADH  
408            formation, the *Gpdh1; dLdh* mutant metabolomic profile provides an explanation for why the  
409            NAD<sup>+</sup>/NADH ratio is normal in double mutants. Moreover, we also observed that ATP levels are  
410            dramatically decreased in *Gpdh<sup>A10/B18</sup>; dLdh<sup>16/17</sup>* double mutants when compared with *Gpdh<sup>A10/+</sup>;*  
411            *dLdh<sup>16/+</sup>* heterozygous controls (Supplemental Figure 4C). This result demonstrates that loss of  
412            both enzymes limits ATP production and is consistent with a model in which glycolytic flux is  
413            restricted in double mutant larvae. Overall, our metabolomic approach not only demonstrates that  
414            the growth defects caused by loss of both dLDH and GPDH1 are associated with severe disruption  
415            of central carbon metabolism but also highlights the plasticity of animal metabolism.

416

## 417 **DISCUSSION**

418  
419 Our findings demonstrate that the ability of dLDH and GPDH1 to cooperatively regulate  
420 NAD<sup>+</sup>/NADH redox balance and carbohydrate metabolism imparts robustness on larval growth.  
421 This relationship likely serves multiple purposes, as the production of lactate and G3P metabolism  
422 not only influences larval NAD<sup>+</sup>/NADH redox balance, but also controls the pool size of glycolytic  
423 intermediates and dictates the manner by which cells generate ATP. Considering that human cells  
424 also up-regulate GPDH1 activity in response to decreased lactate synthesis, our findings indicate  
425 that this metabolic relationship is conserved across animal phyla and hint at a mechanism by which  
426 GPDH1 activity could render tumors resistant to LDH inhibitors.

427

### 428 **The roles of LDH and GPDH1 in cancer and animal development**

429 The possibility of using LDH inhibitors to disrupt tumor growth was first proposed over  
430 60 years ago, shortly after the discovery that the pyruvate analog oxamate disrupts aerobic  
431 glycolysis and slows the growth of HeLa cells (Goldberg and Colowick, 1965; Papaconstantinou  
432 and Colowick, 1961). During the last decade, the goal of using LDH inhibitors as  
433 chemotherapeutic agents has been revisited, with several studies demonstrating that this approach  
434 can disrupt cancer cell growth (Billiard et al., 2013; Boudreau et al., 2016; Daniele et al., 2015;  
435 Fantin et al., 2006; Qing et al., 2010). Yet, despite the promise of such compounds, studies of  
436 human and mouse *LDHA* mutants raise concerns about the potential effectiveness of inhibiting  
437 LDH. First, GSD-XI patients grow and develop normally (Kanno et al., 1988; Kanno et al., 1980;  
438 Miyajima et al., 1995), suggesting that human developmental metabolism can compensate for loss  
439 of this enzyme. Secondly, although *LDHA* inhibition induces elevated TCA cycle flux in cell  
440 culture, this reliance on the TCA cycle is not observed in neither tumors derived from conditional

441 *LDHA* mutant nor *ex vivo* tumor slices treated with an LDH inhibitor (Xie et al., 2014). Such  
442 observations are important because they suggest that the metabolic plasticity of cells in culture  
443 differs significantly from tissues *in vivo*.

444 Our studies in the fly support the *in vivo* mammalian observations – *dLdh* mutants grow  
445 normally and do not increase CO<sub>2</sub> production, indicating that flux through the TCA cycle is  
446 unchanged. Instead, we observed that *dLdh* mutants specifically up-regulate G3P synthesis as a  
447 means of maintaining developmental growth. This finding is consistent with decades of  
448 observation in tumors, insects, and healthy human tissues, which, on the whole, repeatedly pointed  
449 to an inverse correlation between lactate and G3P production (Boxer and Shonk, 1960; Miyajima  
450 et al., 1995; Rechsteiner, 1970; Zebe and McShan, 1957). Moreover, recent cell culture studies  
451 have also demonstrated that LDH inhibitors induce G3P synthesis, thus demonstrating that this  
452 metabolic relationship is present in cultured cells (see supplemental data in Billiard et al., 2013;  
453 Boudreau et al., 2016). Overall, our observations in the fly suggest a common metabolic  
454 relationship that allows animal cells to adapt to redox stress.

455 The link between larval redox balance and the role of G3P in ATP production could also  
456 explain a contradiction in the *Drosophila* metabolism literature. Mutations that disrupt either  
457 glycolysis (*e.g. dERR, Pfk*) or the electron transport chain (ETC) result in severe growth defects  
458 (Mandal et al., 2005; Meiklejohn et al., 2013; Tennessen et al., 2011). In contrast, larvae that harbor  
459 mutations in either the *mitochondrial pyruvate carrier (dMPC1)* or *malate dehydrogenase 2* are  
460 able to complete larval development with relatively mild phenotypes (Bricker et al., 2012; Wang  
461 et al., 2010). Similarly, larvae that lack zygotic *isocitrate dehydrogenase 3b* exhibit developmental  
462 delays but are able to survive until metamorphosis (Duncan et al., 2017). These observations  
463 suggest that while glycolysis and oxidative phosphorylation are necessary for development, larvae

464 do not require a fully functional TCA cycle. This arrangement makes sense in that larval  
465 metabolism is largely dedicated to shuttling metabolic intermediates into biosynthetic pathways.  
466 By activating GPDH1, the production of G3P helps regenerate cytosolic NAD<sup>+</sup> without increasing  
467 CO<sub>2</sub> production while also allowing cells to transfer reducing equivalents to the ETC and generate  
468 ATP.

469

### 470 ***Drosophila* as a model for studying metabolic plasticity**

471 Our study highlights the remarkable metabolic plasticity that underlies animal development  
472 and physiology. Intermediary metabolism adapts to a surprisingly broad range of natural genetic  
473 variation, dietary stress, and metabolic insults. For example, mutations in the *Drosophila*  
474 mitochondrial pyruvate carrier *dMPCI*, which render cells unable to transport pyruvate into the  
475 mitochondria, elicit no obvious phenotypes when mutant larvae are raised under standard growth  
476 conditions (Bricker et al., 2012). Moreover, natural populations of *Drosophila* can buffer larval  
477 development against significant variations in mitochondrial oxidative capacity and the scaling  
478 relationship between mass and metabolic rate (Matoo et al., 2018). A similar phenomenon is also  
479 observed in *C. elegans*, where entire metabolic pathways are rewired in response to dietary stress  
480 or genetic mutations (MacNeil et al., 2013; Watson et al., 2014; Watson et al., 2016). These  
481 examples not only highlight the adaptability of animal metabolism, but also emphasize how little  
482 we understand about this topic. The molecular mechanisms that control adaptive metabolic  
483 rewiring, however, are often difficult to study in a laboratory setting, where animals are raised on  
484 high nutrient diets and buffered against the environmental stress. In this regard, recent advances  
485 in metabolomics provides a powerful approach for understanding how metabolism adapts to  
486 environmental and genetic insults. By analyzing changes in gene expression within the context of

487 metabolomic data, compensatory changes in metabolic flux can be quickly identified and analyzed  
488 using standard model organism genetics. The power of this approach is demonstrated by our  
489 studies of *dLdh*. Even without prior knowledge of the link between LDH and GPDH1 activity, our  
490 study pinpointed increased G3P synthesis as the adaptive response within *dLdh* mutants, thus  
491 demonstrating how metabolomics holds the potential to illuminate the complex metabolic network  
492 that supports animal development.  
493

494 **ACKNOWLEDGEMENTS**

495 We thank the Bloomington *Drosophila* Stock Center (NIH P40OD018537) for providing fly  
496 stocks, the *Drosophila* Genomics Resource Center (NIH 2P40OD010949) for genomic reagents,  
497 and Flybase (NIH 5U41HG000739). Targeted GC-MS analysis was conducted using instruments  
498 housed in the Indiana University Mass Spectrometry Facility, which is supported, in part, by NSF  
499 MRI Award 1726633. Some of the metabolomic analyses described herein performed at the  
500 Metabolomics Core Facility at the University of Utah, which is supported by 1S10OD016232-01,  
501 1S10OD021505-01 and 1U54DK110858-01. Special thanks to Madhulika Rai for useful  
502 comments. C.J.G. was supported, in part, by the Lawrence University LU-R1 program. K.B. and  
503 N.S.S. were supported by National Institute of Health Award R01GM124220. C.R.J. was  
504 supported by NSF CAREER award to K.L.M. (IOS-1149178, IOS-1505247). J.M.T. is supported  
505 by the National Institute of General Medical Sciences of the National Institutes of Health under a  
506 R35 Maximizing Investigators' Research Award (MIRA; 1R35GM119557).

507

508 **FIGURE LEGENDS**

509

510 **Figure 1. dLDH maintains the NAD<sup>+</sup>/NADH redox balance during larval development.**

511 Targeted LC-MS/MS analysis was used to measure metabolites associated with redox balance in  
512 *dLdh<sup>prec</sup>* controls and *dLdh<sup>16/17</sup>* mutants. The ratio of (A-B) NAD<sup>+</sup>/NADH, NADP<sup>+</sup>/NADPH,  
513 GSH/GSSG, AMP/ATP and ADP/ATP were determined in control and mutant larvae. n=8  
514 samples collected from independent populations with 100 mid-L2 larvae per sample. (C) *dLdh<sup>prec</sup>*  
515 controls and *dLdh<sup>16/17</sup>* mutants were collected as mid-L2 larvae and the concentration of  
516 triglycerides (TAG), trehalose (Treh), and glycogen (Glyc) were measured in whole animal  
517 homogenates. All data were normalized to soluble protein. For all assays, n>10 samples collected  
518 from independent populations with 25 mid-L2 larvae per sample. (D) The rate of CO<sub>2</sub> production  
519 was measured *dLdh<sup>16/17</sup>* mutants and precise excision controls. For (A-C), \* *P* < 0.05. \*\*\* *P* <  
520 0.001. Error bars represent one standard deviation.

521

522 **Figure 2. Metabolomic analysis of *dLdh* mutants.** Data from GC-MS metabolomic analysis

523 (Supplemental Table 3) comparing *dLdh<sup>prec</sup>* controls and *dLdh<sup>16/17</sup>* mutants were analyzed using  
524 Metaboanalyst. (A) A volcano plot highlighting metabolites that exhibited a >1.5-fold change and  
525 a p-value of <0.01. \*Note that changes in 2OG levels were not reproducible in subsequent  
526 experiments. (B) The relative abundance of metabolites that exhibited significant changes in all  
527 four GC-MS experiments (*P* < 0.01; see Supplemental Table 2). (C) The relative abundance of  
528 G3P was measured in *dLdh<sup>prec</sup>* controls, *dLdh<sup>16/17</sup>* mutants, and *p{dLdh}; dLdh<sup>16/17</sup>* rescued animals  
529 during the L2 larval stage. (D) Lactate and G3P levels were measured in L2 larvae that  
530 ubiquitously expressed either a *UAS-GFP-RNAi* construct or a *UAS-dLdh-RNAi* construct under



531 the control of *da-GAL4*. Abbreviations as follow: lactate (Lac), 2-hydroxyglutarate (2HG),  
532 pyruvate (Pyr), glycerol-3-phosphate (G3P), 2-oxoglutarate (2OG), not significant (n.s.). n=6  
533 samples collected from independent populations with 25 mid-L2 larvae per sample. \*\*\*  $P < 0.001$ .

534

535 **Figure 3. GPDH1 controls NAD<sup>+</sup>/NADH redox balance during larval development.** (A) A

536 schematic diagram illustrating how GPDH1 and dLDH redundantly influence NAD<sup>+</sup> levels.

537 Abbreviations as follow: dihydroxyacetone phosphate (DHAP), glycerol-3-phosphate (G3P),

538 pyruvate (Pyr), lactate (Lac). (B) GC-MS was used to measure relative G3P abundance in mid-L2

539 larvae for the following five genotypes: *Gpdh1<sup>A10/+</sup>*, *Gpdh1<sup>A10/B18</sup>*, *Gpdh1<sup>A10/B18</sup>; da-GAL4*,

540 *Gpdh<sup>A10/B18</sup>; UAS-Gpdh1*, and *Gpdh1<sup>A10/B18</sup>; da-GAL4 UAS-Gpdh1*. Data are represented as box

541 plots,  $n = 6$ . \*\*\* $P < 0.001$ . (C) The NAD<sup>+</sup>/NADH ratio in mid-L2 larvae of the following

542 genotypes: *dLdh<sup>prec</sup>*, *dLdh<sup>16/17</sup>*, *Gpdh1<sup>A10/+</sup>*, and *Gpdh1<sup>A10/B18</sup>*. (D) mid-L2 larvae were fed D-

543 glucose-<sup>13</sup>C<sub>6</sub> for two hours and the rate of <sup>13</sup>C isotope incorporation into lactate (Lac) and G3P

544 was determined based on m+3 isotopologue abundance. (E) ATP levels are significantly decreased

545 in *Gpdh1<sup>A10/B18</sup>* as compared with *Gpdh1<sup>A10/+</sup>* controls. (F) The body mass of *Gpdh1<sup>A10/B18</sup>* larvae

546 is significantly lower than that of *Gpdh1<sup>A10/+</sup>* controls 0-4 hours after the L2-L3 molt. In panels

547 (B-F), n=6 samples per genotype. \*\*\* $P < 0.001$ . For (C-F), error bars represent one standard

548 deviation.

549

550 **Figure 4. *Gpdh1*; *dLdh* double mutants exhibit severe growth phenotypes.** (A) Representative

551 images of larvae from synchronized populations of *w<sup>1118</sup>*, *dLdh<sup>16/17</sup>*, *Gpdh1<sup>A10/B18</sup>*, or *Gpdh1<sup>A10/B18</sup>; dLdh<sup>16/17</sup>*

552 double mutants. Note the severe developmental delay exhibited by double mutant larvae.

553 (B) The body mass of *w<sup>1118</sup>* and *Gpdh1<sup>A10/B18</sup>; dLdh<sup>16/17</sup>* double mutant larvae measured 72 hours

554 after egg-laying. (C) The viability of the four genotypes listed in (A) were measured during defined  
555 periods of larval development. (B,C) Error bars represent one standard deviation. n=6 samples per  
556 genotype. (D-H) Maximum projections of dorsal half of L2 larval brains stained for Dpn (green)  
557 and DAPI (blue) from (D)  $w^{1118}$  controls, (E)  $dLdh^{16/17}$  mutants, (F)  $Gpdh1^{A10/B18}$  mutants, (G) age-  
558 matched  $Gpdh1^{A10/B18}; dLdh^{16/17}$  double mutants, and (H) size-matched  $Gpdh1^{A10/B18}; dLdh^{16/17}$   
559 double mutants. The scale bar in (D) applies to (E-H). Note that the (D'-H') display the Dpn  
560 channel alone in gray scale. \*\*\* $P < 0.001$ .

561  
562 **Figure 5. The DNA replication rate is decreased in brains of  $Gpdh1; dLdh$  double mutants**

563 (A-D) Maximum projections of dorsal half of size-matched L2 larval brains stained for EdU (red)  
564 and DAPI (blue) from (A)  $w^{1118}$  controls, (B)  $dLdh^{16/17}$  mutants, (C)  $Gpdh1^{A10/B18}$  mutants, and (D)  
565  $Gpdh1^{A10/B18}; dLdh^{16/17}$  double mutants. The scale bar in (A) applies to (A-D). Panels (A'-D')  
566 display EdU staining alone in gray scale. (E) Histogram of the number of EdU positive cells per  
567 dorsal brain lobe per genotype. For all panels, p-value adjusted for multiple comparisons using the  
568 Bonferroni-Dunn method. \*  $P < 0.05$ . \*\* $P < 0.01$ , \*\*\* $P < 0.001$ .

569  
570 **Figure 6. Amino acid and glucose metabolism are disrupted in  $Gpdh1; dLdh$  double mutants.**

571 (A) The  $NAD^+/NADH$  ratio was measured in  $w^{1118}$ ,  $dLdh^{16/17}$ ,  $Gpdh1^{A10/B18}$ , and  $Gpdh1^{A10/B18};$   
572  $dLdh^{16/17}$  mid-L2 larvae. Error bars represent one standard deviation. n=6 samples per genotype.  
573 (B) A heat-map summarizing changes in metabolite abundance in  $dLdh^{16/17}$  mutants relative to  
574  $dLdh^{prec}$  controls,  $Gpdh1^{A10/B18}$  mutants relative to  $Gpdh1^{A10/+}$  controls, and  $Gpdh1^{A10/B18}; dLdh^{16/17}$   
575 double mutants relative to  $Gpdh1^{A10/+}; dLdh^{16/+}$  controls. The abundance of select metabolites for  
576 either (C)  $Gpdh1^{A10/B18}$  mutants relative to  $Gpdh1^{A10/+}$  controls or (D)  $Gpdh1^{A10/B18}; dLdh^{16/17}$

577 double mutants relative to *Gpdh1<sup>A10/+</sup>*; *dLdh<sup>16/+</sup>* are represented as box plots. For all panels, p-  
578 value adjusted for multiple comparisons using the Bonferroni-Dunn method. \*  $P < 0.05$ .  
579 \*\* $P < 0.01$ , \*\*\* $P < 0.001$ .

580 LITERATURE CITED

581

- 582 **Avi-Dor, Y. and Mager, J.** (1956). The effect of fluoropyruvate on the respiration of animal-  
583 tissue preparations. *Biochem J* **63**, 613-618.
- 584 **Backhaus, B., Sulkowski, E. and Schlote, F.** (1984). A semi-synthetic, general-purpose  
585 medium for *Drosophila melanogaster*. *Dros. Inf. Serv* **60**, 210-212.
- 586 **Bewley, G. C. and Lucchesi, J. C.** (1977). Origin of alpha-glycerophosphate dehydrogenase  
587 isozymes in *Drosophila melanogaster* and their functional relationship in the alpha-  
588 glycerophosphate cycle. *Biochem Genet* **15**, 235-251.
- 589 **Billiard, J., Dennison, J. B., Briand, J., Annan, R. S., Chai, D., Colon, M., Dodson, C. S.,**  
590 **Gilbert, S. A., Greshock, J., Jing, J., et al.** (2013). Quinoline 3-sulfonamides inhibit  
591 lactate dehydrogenase A and reverse aerobic glycolysis in cancer cells. *Cancer Metab*  
592 **1**, 19.
- 593 **Boudreau, A., Purkey, H. E., Hitz, A., Robarge, K., Peterson, D., Labadie, S., Kwong, M.,**  
594 **Hong, R., Gao, M., Del Nagro, C., et al.** (2016). Metabolic plasticity underpins innate  
595 and acquired resistance to LDHA inhibition. *Nat Chem Biol* **12**, 779-786.
- 596 **Boxer, G. E. and Shonk, C. E.** (1960). Low levels of soluble DPN-linked alpha-  
597 glycerophosphate dehydrogenase in tumors. *Cancer Res* **20**, 85-91.
- 598 **Bricker, D. K., Taylor, E. B., Schell, J. C., Orsak, T., Boutron, A., Chen, Y. C., Cox, J. E.,**  
599 **Cardon, C. M., Van Vranken, J. G., Dephoure, N., et al.** (2012). A mitochondrial  
600 pyruvate carrier required for pyruvate uptake in yeast, *Drosophila*, and humans.  
601 *Science* **337**, 96-100.
- 602 **Bulusu, V., Prior, N., Snaebjornsson, M. T., Kuehne, A., Sonnen, K. F., Kress, J., Stein, F.,**  
603 **Schultz, C., Sauer, U. and Aulehla, A.** (2017). Spatiotemporal Analysis of a  
604 Glycolytic Activity Gradient Linked to Mouse Embryo Mesoderm Development. *Dev*  
605 *Cell* **40**, 331-341 e334.
- 606 **Chong, J., Soufan, O., Li, C., Caraus, I., Li, S., Bourque, G., Wishart, D. S. and Xia, J.** (2018).  
607 MetaboAnalyst 4.0: towards more transparent and integrative metabolomics  
608 analysis. *Nucleic Acids Res* **46**, W486-W494.
- 609 **Cooper, E. H., Barkhan, P. and Hale, A. J.** (1963). Observations on the proliferation of  
610 human leucocytes cultured with phytohaemagglutinin. *Br J Haematol* **9**, 101-111.
- 611 **Cox, J. E., Thummel, C. S. and Tennessen, J. M.** (2017). Metabolomic Studies in *Drosophila*.  
612 *Genetics* **206**, 1169-1185.
- 613 **Daniele, S., Giacomelli, C., Zappelli, E., Granchi, C., Trincavelli, M. L., Minutolo, F. and**  
614 **Martini, C.** (2015). Lactate dehydrogenase-A inhibition induces human  
615 glioblastoma multiforme stem cell differentiation and death. *Sci Rep* **5**, 15556.
- 616 **Duncan, D. M., Kiefel, P. and Duncan, I.** (2017). Mutants for *Drosophila* Isocitrate  
617 Dehydrogenase 3b Are Defective in Mitochondrial Function and Larval Cell Death.  
618 *G3* **7**, 789-799.
- 619 **Fantin, V. R., St-Pierre, J. and Leder, P.** (2006). Attenuation of LDH-A expression uncovers  
620 a link between glycolysis, mitochondrial physiology, and tumor maintenance. *Cancer*  
621 *Cell* **9**, 425-434.

- 622 **Flores, A., Schell, J., Krall, A. S., Jelinek, D., Miranda, M., Grigorian, M., Braas, D., White,**  
623 **A. C., Zhou, J. L., Graham, N. A., et al.** (2017). Lactate dehydrogenase activity drives  
624 hair follicle stem cell activation. *Nat Cell Biol* **19**, 1017-1026.
- 625 **Goldberg, E. B. and Colowick, S. P.** (1965). The Role of Glycolysis in the Growth of Tumor  
626 Cells. 3. Lactic Dehydrogenase as the Site of Action of Oxamate on the Growth of  
627 Cultured Cells. *J Biol Chem* **240**, 2786-2790.
- 628 **Goldberg, E. B., Nitowsky, H. M. and Colowick, S. P.** (1965). The Role of Glycolysis in the  
629 Growth of Tumor Cells. Iv. The Basis of Glucose Toxicity in Oxamate-Treated,  
630 Cultured Cells. *J Biol Chem* **240**, 2791-2796.
- 631 **Gratz, S. J., Cummings, A. M., Nguyen, J. N., Hamm, D. C., Donohue, L. K., Harrison, M.**  
632 **M., Wildonger, J. and O'Connor-Giles, K. M.** (2013). Genome engineering of  
633 *Drosophila* with the CRISPR RNA-guided Cas9 nuclease. *Genetics* **194**, 1029-1035.
- 634 **Graveley, B. R., Brooks, A. N., Carlson, J. W., Duff, M. O., Landolin, J. M., Yang, L., Artieri,**  
635 **C. G., van Baren, M. J., Boley, N., Booth, B. W., et al.** (2011). The developmental  
636 transcriptome of *Drosophila melanogaster*. *Nature* **471**, 473-479.
- 637 **Hoekstra, L. A. and Montooth, K. L.** (2013). Inducing extra copies of the Hsp70 gene in  
638 *Drosophila melanogaster* increases energetic demand. *BMC Evol Biol* **13**, 68.
- 639 **Hoekstra, L. A., Siddiq, M. A. and Montooth, K. L.** (2013). Pleiotropic effects of a  
640 mitochondrial-nuclear incompatibility depend upon the accelerating effect of  
641 temperature in *Drosophila*. *Genetics* **195**, 1129-1139.
- 642 **Kanno, T., Sudo, K., Maekawa, M., Nishimura, Y., Ukita, M. and Fukutake, K.** (1988).  
643 Lactate dehydrogenase M-subunit deficiency: a new type of hereditary exertional  
644 myopathy. *Clin Chim Acta* **173**, 89-98.
- 645 **Kanno, T., Sudo, K., Takeuchi, I., Kanda, S., Honda, N., Nishimura, Y. and Oyama, K.**  
646 (1980). Hereditary deficiency of lactate dehydrogenase M-subunit. *Clin Chim Acta*  
647 **108**, 267-276.
- 648 **Li, H., Chawla, G., Hurlburt, A. J., Sterrett, M. C., Zaslaver, O., Cox, J., Karty, J. A.,**  
649 **Rosebrock, A. P., Caudy, A. A. and Tennessen, J. M.** (2017). *Drosophila* larvae  
650 synthesize the putative oncometabolite L-2-hydroxyglutarate during normal  
651 developmental growth. *Proc Natl Acad Sci U S A* **114**, 1353-1358.
- 652 **Li, H. and Tennessen, J. M.** (2017). Methods for studying the metabolic basis of *Drosophila*  
653 development. *Wiley Interdiscip Rev Dev Biol* **6**.
- 654 ---- (2018). Preparation of *Drosophila* Larval Samples for Gas Chromatography-Mass  
655 Spectrometry (GC-MS)-based Metabolomics. *J Vis Exp*.
- 656 **Li, Y., Padmanabha, D., Gentile, L. B., Dumur, C. I., Beckstead, R. B. and Baker, K. D.**  
657 (2013). HIF- and non-HIF-regulated hypoxic responses require the estrogen-related  
658 receptor in *Drosophila melanogaster*. *PLoS Genet* **9**, e1003230.
- 659 **Luhur, A., Buddika, K., Ariyapala, I. S., Chen, S. and Sokol, N. S.** (2017). Opposing Post-  
660 transcriptional Control of InR by FMRP and LIN-28 Adjusts Stem Cell-Based Tissue  
661 Growth. *Cell Rep* **21**, 2671-2677.
- 662 **Luhur, A., Chawla, G., Wu, Y. C., Li, J. and Sokol, N. S.** (2014). Drosha-independent  
663 DGCR8/Pasha pathway regulates neuronal morphogenesis. *Proc Natl Acad Sci U S A*  
664 **111**, 1421-1426.
- 665 **MacNeil, L. T., Watson, E., Arda, H. E., Zhu, L. J. and Walhout, A. J.** (2013). Diet-induced  
666 developmental acceleration independent of TOR and insulin in *C. elegans*. *Cell* **153**,  
667 240-252.

- 668 **Maekawa, M., Sudo, K., Kanno, T. and Li, S. S.** (1990). Molecular characterization of  
669 genetic mutation in human lactate dehydrogenase-A (M) deficiency. *Biochem*  
670 *Biophys Res Commun* **168**, 677-682.
- 671 **Mandal, S., Guptan, P., Owusu-Ansah, E. and Banerjee, U.** (2005). Mitochondrial  
672 regulation of cell cycle progression during development as revealed by the tenured  
673 mutation in *Drosophila*. *Dev Cell* **9**, 843-854.
- 674 **Matoo, O. B., Julick, C. R. and Montooth, K. L.** (2018). Genetic variation for ontogenetic  
675 shifts in metabolism underlies physiological homeostasis in *Drosophila*. *bioRxiv*  
676 **456269**.
- 677 **Mccabe, C. T. and Bursell, E.** (1975). Interrelationships between Amino-Acid and Lipid-  
678 Metabolism in Tsetse-Fly, *Glossina-Morsitans*. *Insect Biochem* **5**, 781-789.
- 679 **Meiklejohn, C. D., Holmbeck, M. A., Siddiq, M. A., Abt, D. N., Rand, D. M. and Montooth,**  
680 **K. L.** (2013). An Incompatibility between a mitochondrial tRNA and its nuclear-  
681 encoded tRNA synthetase compromises development and fitness in *Drosophila*.  
682 *PLoS Genet* **9**, e1003238.
- 683 **Miyajima, H., Takahashi, Y. and Kaneko, E.** (1995). Characterization of the glycolysis in  
684 lactate dehydrogenase-A deficiency. *Muscle Nerve* **18**, 874-878.
- 685 **Miyazawa, H. and Aulehla, A.** (2018). Revisiting the role of metabolism during  
686 development. *Development* **145**.
- 687 **O'Brien, S. J. and MacIntyre, R. J.** (1972). The -glycerophosphate cycle in *Drosophila*  
688 *melanogaster*. I. Biochemical and developmental aspects. *Biochem Genet* **7**, 141-161.
- 689 **Oginuma, M., Moncuquet, P., Xiong, F., Karoly, E., Chal, J., Guevorkian, K. and**  
690 **Pourquie, O.** (2017). A Gradient of Glycolytic Activity Coordinates FGF and Wnt  
691 Signaling during Elongation of the Body Axis in Amniote Embryos. *Dev Cell* **40**, 342-  
692 353 e310.
- 693 **Oliveira, M. T. and Kaguni, L. S.** (2011). Reduced stimulation of recombinant DNA  
694 polymerase gamma and mitochondrial DNA (mtDNA) helicase by variants of  
695 mitochondrial single-stranded DNA-binding protein (mtSSB) correlates with defects  
696 in mtDNA replication in animal cells. *J Biol Chem* **286**, 40649-40658.
- 697 **Papaconstantinou, J. and Colowick, S. P.** (1961). The role of glycolysis in the growth of  
698 tumor cells. I. Effects of oxamic acid on the metabolism of Ehrlich ascites tumor cells  
699 in vitro. *J Biol Chem* **236**, 278-284.
- 700 **Pearce, E. L., Poffenberger, M. C., Chang, C. H. and Jones, R. G.** (2013). Fueling immunity:  
701 insights into metabolism and lymphocyte function. *Science* **342**, 1242454.
- 702 **Qing, G., Skuli, N., Mayes, P. A., Pawel, B., Martinez, D., Maris, J. M. and Simon, M. C.**  
703 (2010). Combinatorial regulation of neuroblastoma tumor progression by N-Myc  
704 and hypoxia inducible factor HIF-1alpha. *Cancer Res* **70**, 10351-10361.
- 705 **Rechsteiner, M. C.** (1970). *Drosophila* lactate dehydrogenase and alpha-glycerolphosphate  
706 dehydrogenase: distribution and change in activity during development. *J Insect*  
707 *Physiol* **16**, 1179-1192.
- 708 **Schell, J. C., Wisidagama, D. R., Bensard, C., Zhao, H., Wei, P., Tanner, J., Flores, A.,**  
709 **Mohlman, J., Sorensen, L. K., Earl, C. S., et al.** (2017). Control of intestinal stem cell  
710 function and proliferation by mitochondrial pyruvate metabolism. *Nat Cell Biol* **19**,  
711 1027-1036.



- 712 **Sebo, Z. L., Lee, H. B., Peng, Y. and Guo, Y.** (2014). A simplified and efficient germline-  
713 specific CRISPR/Cas9 system for *Drosophila* genomic engineering. *Fly (Austin)* **8**, 52-  
714 57.
- 715 **Team, R. C.** (2017). R: A language and environment for statistical computing. R Foundation  
716 for Statistical Computing.
- 717 **Tennessen, J. M., Baker, K. D., Lam, G., Evans, J. and Thummel, C. S.** (2011). The  
718 *Drosophila* estrogen-related receptor directs a metabolic switch that supports  
719 developmental growth. *Cell Metab* **13**, 139-148.
- 720 **Tennessen, J. M., Barry, W. E., Cox, J. and Thummel, C. S.** (2014a). Methods for studying  
721 metabolism in *Drosophila*. *Methods* **68**, 105-115.
- 722 **Tennessen, J. M., Bertagnolli, N. M., Evans, J., Sieber, M. H., Cox, J. and Thummel, C. S.**  
723 (2014b). Coordinated metabolic transitions during *Drosophila* embryogenesis and  
724 the onset of aerobic glycolysis. *G3* **4**, 839-850.
- 725 **Tixier, V., Bataille, L., Etard, C., Jagla, T., Weger, M., Daponte, J. P., Strahle, U.,**  
726 **Dickmeis, T. and Jagla, K.** (2013). Glycolysis supports embryonic muscle growth by  
727 promoting myoblast fusion. *Proc Natl Acad Sci U S A* **110**, 18982-18987.
- 728 **Vander Heiden, M. G., Cantley, L. C. and Thompson, C. B.** (2009). Understanding the  
729 Warburg effect: the metabolic requirements of cell proliferation. *Science* **324**, 1029-  
730 1033.
- 731 **Wang, L., Lam, G. and Thummel, C. S.** (2010). *Med24* and *Mdh2* are required for  
732 *Drosophila* larval salivary gland cell death. *Dev Dyn* **239**, 954-964.
- 733 **Wang, T., Marquardt, C. and Foker, J.** (1976). Aerobic glycolysis during lymphocyte  
734 proliferation. *Nature* **261**, 702-705.
- 735 **Warburg, O.** (1956). On the origin of cancer cells. *Science* **123**, 309-314.
- 736 **Warton, D. I., Wright, I. J., Falster, D. S. and Westoby, M.** (2006). Bivariate line-fitting  
737 methods for allometry. *Biol Rev Camb Philos Soc* **81**, 259-291.
- 738 **Watson, E., MacNeil, L. T., Ritter, A. D., Yilmaz, L. S., Rosebrock, A. P., Caudy, A. A. and**  
739 **Walhout, A. J.** (2014). Interspecies systems biology uncovers metabolites affecting  
740 *C. elegans* gene expression and life history traits. *Cell* **156**, 759-770.
- 741 **Watson, E., Olin-Sandoval, V., Hoy, M. J., Li, C. H., Louise, T., Yao, V., Mori, A., Holdorf,**  
742 **A. D., Troyanskaya, O. G., Ralser, M., et al.** (2016). Metabolic network rewiring of  
743 propionate flux compensates vitamin B12 deficiency in *C. elegans*. *Elife* **5**.
- 744 **Xie, H., Hanai, J., Ren, J. G., Kats, L., Burgess, K., Bhargava, P., Signoretti, S., Billiard, J.,**  
745 **Duffy, K. J., Grant, A., et al.** (2014). Targeting lactate dehydrogenase--a inhibits  
746 tumorigenesis and tumor progression in mouse models of lung cancer and impacts  
747 tumor-initiating cells. *Cell Metab* **19**, 795-809.
- 748 **Yoshikuni, K., Tagami, H., Yamada, M., Sudo, K. and Kanno, T.** (1986).  
749 Erythematous skin lesions in hereditary lactate dehydrogenase M-subunit  
750 deficiency. *Arch Dermatol* **122**, 1420-1424.
- 751 **Zdravlevic, M., Brand, A., Di Ianni, L., Dettmer, K., Reinders, J., Singer, K., Peter, K.,**  
752 **Schnell, A., Bruss, C., Decking, S. M., et al.** (2018). Double genetic disruption of  
753 lactate dehydrogenase A and B is required to ablate the 'Warburg effect' restricting  
754 tumor growth to oxidative metabolism. *J Biol Chem*.
- 755 **Zebe, E. C. and McShan, W. H.** (1957). Lactic and alpha-glycerophosphate dehydrogenases  
756 in insects. *J Gen Physiol* **40**, 779-790.
- 757

758



759 **Supplemental Figure Legends**

760

761 **Supplemental Figure 1. Mitochondrial abundance is unaffected by *dLdh* mutations.** (A) The  
762 relative abundance of mitochondrial DNA is similar in *dLdh<sup>prec</sup>* controls and *dLdh<sup>16/17</sup>* mutants.  
763 Ratio is based on the abundance of *mt::CoI* copy number relative to *Rpl32* copy number. Error  
764 bars represent standard deviation.

765

766 **Supplemental Figure 2. Generation of *Gpdh1* mutants.** (A) A schematic diagram illustrating  
767 the *Gpdh1* locus, sequences targeted by guide RNA constructs, and sequence deleted by the  
768 *Gpdh1<sup>A10</sup>* and *Gpdh1<sup>B18</sup>* mutations. Deleted bases are highlighted in red. (B) A schematic diagram  
769 illustrating the location of the *Gpdh1<sup>A10</sup>* and *Gpdh1<sup>B18</sup>* mutations within the GPDH1 protein. (C)  
770 *Gpdh1<sup>A10/+</sup>*, and *Gpdh1<sup>A10/B18</sup>* mutants were analyzed for larval viability. Bars represent the percent  
771 of animals that survived from the previous developmental stage until the stage noted on the x-axis.  
772 Error bars represent standard deviation. n>100 larvae per timepoint.

773

774 **Supplemental Figure 3. The intestine of *Gpdh<sup>A10/B18</sup>; dLdh<sup>16/17</sup>* double mutant larvae exhibit**  
775 **growth defects and contain smaller cells.** (A-E) L2 larval posterior midguts (PMGs) stained for  
776 DAPI (gray) from (A) *w<sup>1118</sup>* controls, (B) *Gpdh1<sup>A10/B18</sup>* mutants, (C) *dLdh<sup>16/17</sup>* mutants, (D) age-  
777 matched *Gpdh1<sup>A10/B18</sup>; dLdh<sup>16/17</sup>* double mutants, and (E) size-matched *Gpdh1<sup>A10/B18</sup>; dLdh<sup>16/17</sup>*  
778 double mutants. (A'-E') Magnified images of the outlined regions in A-E. The scale bar in (E) and  
779 (E') apply to (A-E) and (A'-E'), respectively. (F) Histogram of nuclei size. \*\*\*\* P < 0.0001.

780

781 **Supplemental Figure 4. *Gpdh1*; *dLdh* double mutants exhibit significant changes in purine**  
782 **catabolism and ATP production.** GC-MS was used to measure the relative abundance of  
783 xanthine and urate in either (A) *Gpdh1*<sup>A10/B18</sup> mutants relative to *Gpdh1*<sup>A10/+</sup> controls or (B)  
784 *Gpdh1*<sup>A10/B18</sup>; *dLdh*<sup>16/17</sup> double mutants relative to *Gpdh1*<sup>A10/+</sup>; *dLdh*<sup>16/+</sup>. (C) ATP levels are  
785 significantly decreased in *Gpdh1*<sup>A10/B18</sup>; *dLdh*<sup>16/17</sup> double mutants relative to *Gpdh1*<sup>A10/+</sup>; *dLdh*<sup>16/+</sup>.  
786 \*\*\**P* < 0.001.

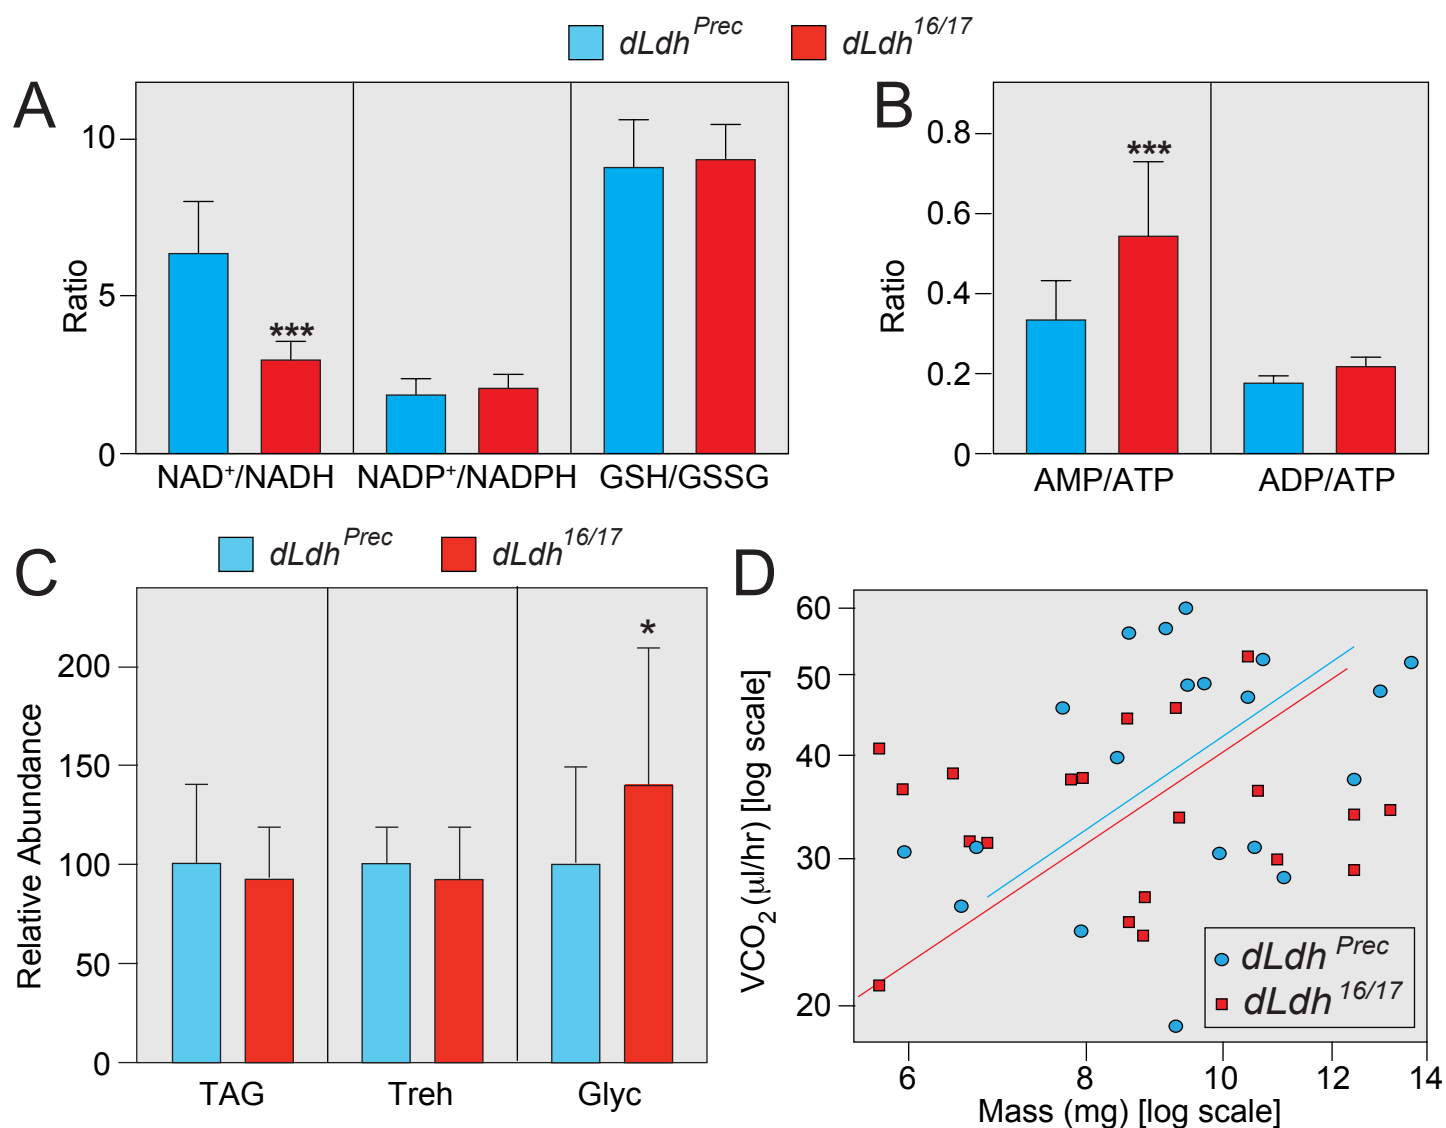

**Figure 1. dLDH maintains the NAD<sup>+</sup>/NADH redox balance during larval development.** Targeted LC-MS/MS analysis was used to measure metabolites associated with redox balance in *dLdh*<sup>Prec</sup> controls and *dLdh*<sup>16/17</sup> mutants. The ratio of (A-B) NAD<sup>+</sup>/NADH, NADP<sup>+</sup>/NADPH, GSH/GSSG, AMP/ATP and ADP/ATP were determined in control and mutant larvae. n=8 samples collected from independent populations with 100 mid-L2 larvae per sample. (C) *dLdh*<sup>Prec</sup> controls and *dLdh*<sup>16/17</sup> mutants were collected as mid-L2 larvae and the concentration of triglycerides (TAG), trehalose (Treh), and glycogen (Glyc) were measured in whole animal homogenates. All data were normalized to soluble protein. For all assays, n>10 samples collected from independent populations with 25 mid-L2 larvae per sample. (D) The rate of CO<sub>2</sub> production was measured *dLdh*<sup>16/17</sup> mutants and precise excision controls. For (A-C), \* *P* < 0.05. \*\*\* *P* < 0.001. Error bars represent one standard deviation.

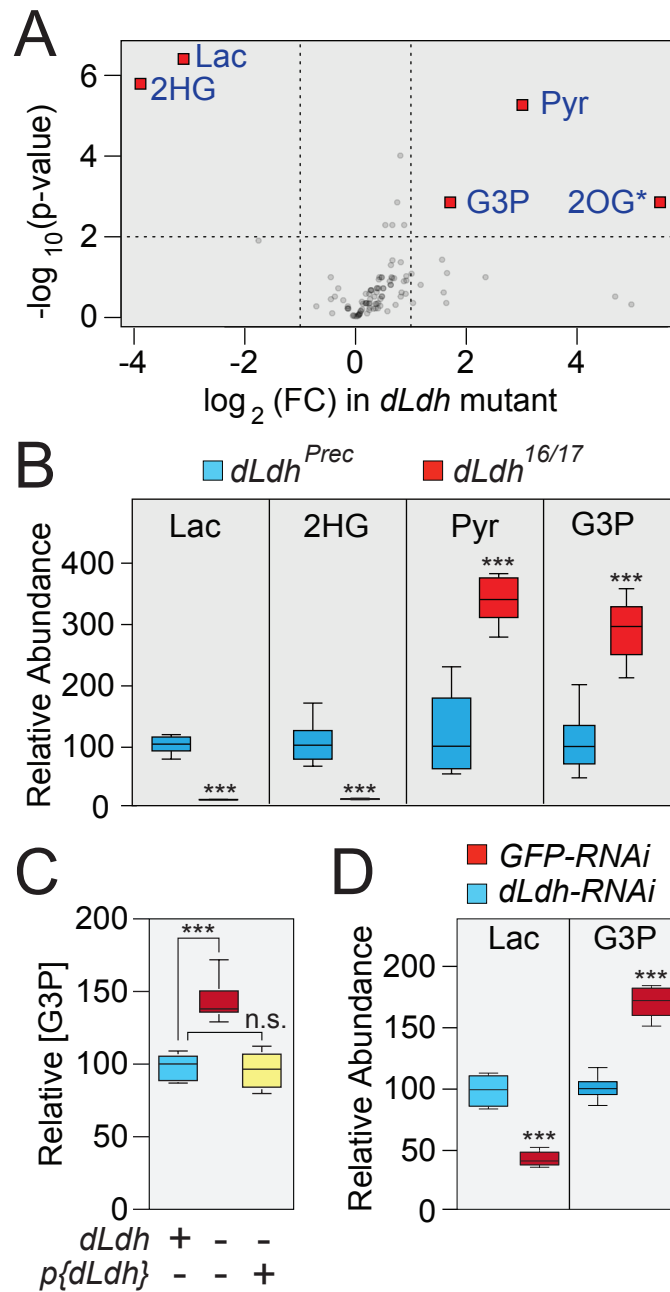

**Figure 2. Metabolomic analysis of *dLdh* mutants.** Data from GC-MS metabolomic analysis (Supplemental Table 3) comparing *dLdh<sup>prec</sup>* controls and *dLdh<sup>16/17</sup>* mutants were analyzed using Metaboanalyst. (A) A volcano plot highlighting metabolites that exhibited a >1.5-fold change and a p-value of <0.01. \*Note that changes in 2OG levels were not reproducible in subsequent experiments. (B) The relative abundance of metabolites that exhibited significant changes in all four GC-MS experiments ( $P < 0.01$ ; see Supplemental Table 2). (C) The relative abundance of G3P was measured in *dLdh<sup>prec</sup>* controls, *dLdh<sup>16/17</sup>* mutants, and *p{dLdh}; dLdh<sup>16/17</sup>* rescued animals during the L2 larval stage. (D) Lactate and G3P levels were measured in L2 larvae that ubiquitously expressed either a *UAS-GFP-RNAi* construct or a *UAS-dLdh-RNAi* construct under the control of *da-GAL4*. Abbreviations as follow: lactate (Lac), 2-hydroxyglutarate (2HG), pyruvate (Pyr), glycerol-3-phosphate (G3P), 2-oxoglutarate (2OG), not significant (n.s.).  $n=6$  samples collected from independent populations with 25 mid-L2 larvae per sample. \*\*\*  $P < 0.001$ .

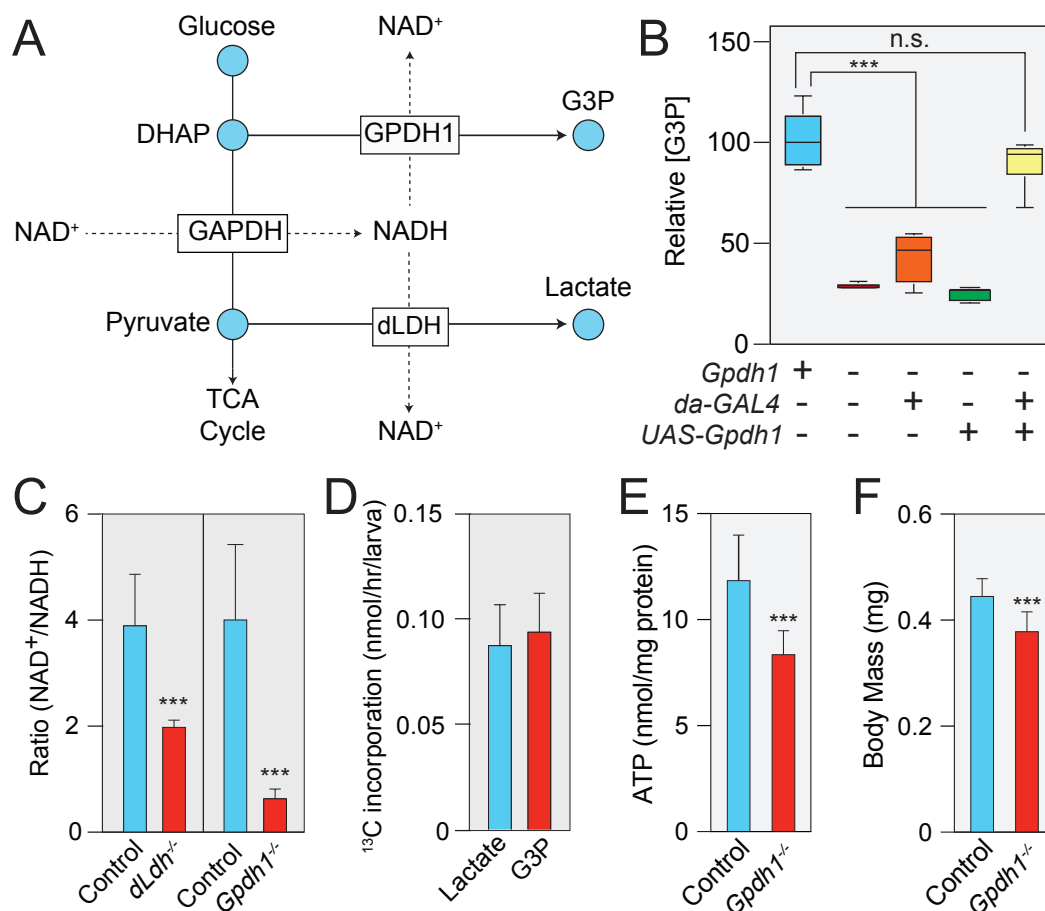

**Figure 3. GPDH1 controls NAD<sup>+</sup>/NADH redox balance during larval development.**

(A) A schematic diagram illustrating how GPDH1 and dLDH redundantly influence NAD<sup>+</sup> levels. Abbreviations as follow: dihydroxyacetone phosphate (DHAP), glycerol-3-phosphate (G3P), pyruvate (Pyr), lactate (Lac). (B) GC-MS was used to measure relative G3P abundance in mid-L2 larvae for the following five genotypes: *Gpdh1*<sup>A10/+</sup>, *Gpdh1*<sup>A10/B18</sup>, *Gpdh1*<sup>A10/B18</sup>; *da-GAL4*, *Gpdh*<sup>A10/B18</sup>; *UAS-Gpdh1*, and *Gpdh1*<sup>A10/B18</sup>; *da-GAL4 UAS-Gpdh1*. Data are represented as box plots, *n* = 6. \*\*\**P* < 0.001. (C) The NAD<sup>+</sup>/NADH ratio in mid-L2 larvae of the following genotypes: *dLdh*<sup>prec</sup>, *dLdh*<sup>16/17</sup>, *Gpdh1*<sup>A10/+</sup>, and *Gpdh1*<sup>A10/B18</sup>. (D) mid-L2 larvae were fed D-glucose-<sup>13</sup>C<sub>6</sub> for two hours and the rate of <sup>13</sup>C isotope incorporation into lactate (Lac) and G3P was determined based on m+3 isotopologue abundance. (E) ATP levels are significantly decreased in *Gpdh1*<sup>A10/B18</sup> as compared with *Gpdh1*<sup>A10/+</sup> controls. (F) The body mass of *Gpdh1*<sup>A10/B18</sup> larvae is significantly lower than that of *Gpdh1*<sup>A10/+</sup> controls 0-4 hours after the L2-L3 molt. In panels (B-F), *n*=6 samples per genotype. \*\*\**P* < 0.001. For (C-F), error bars represent one standard deviation.

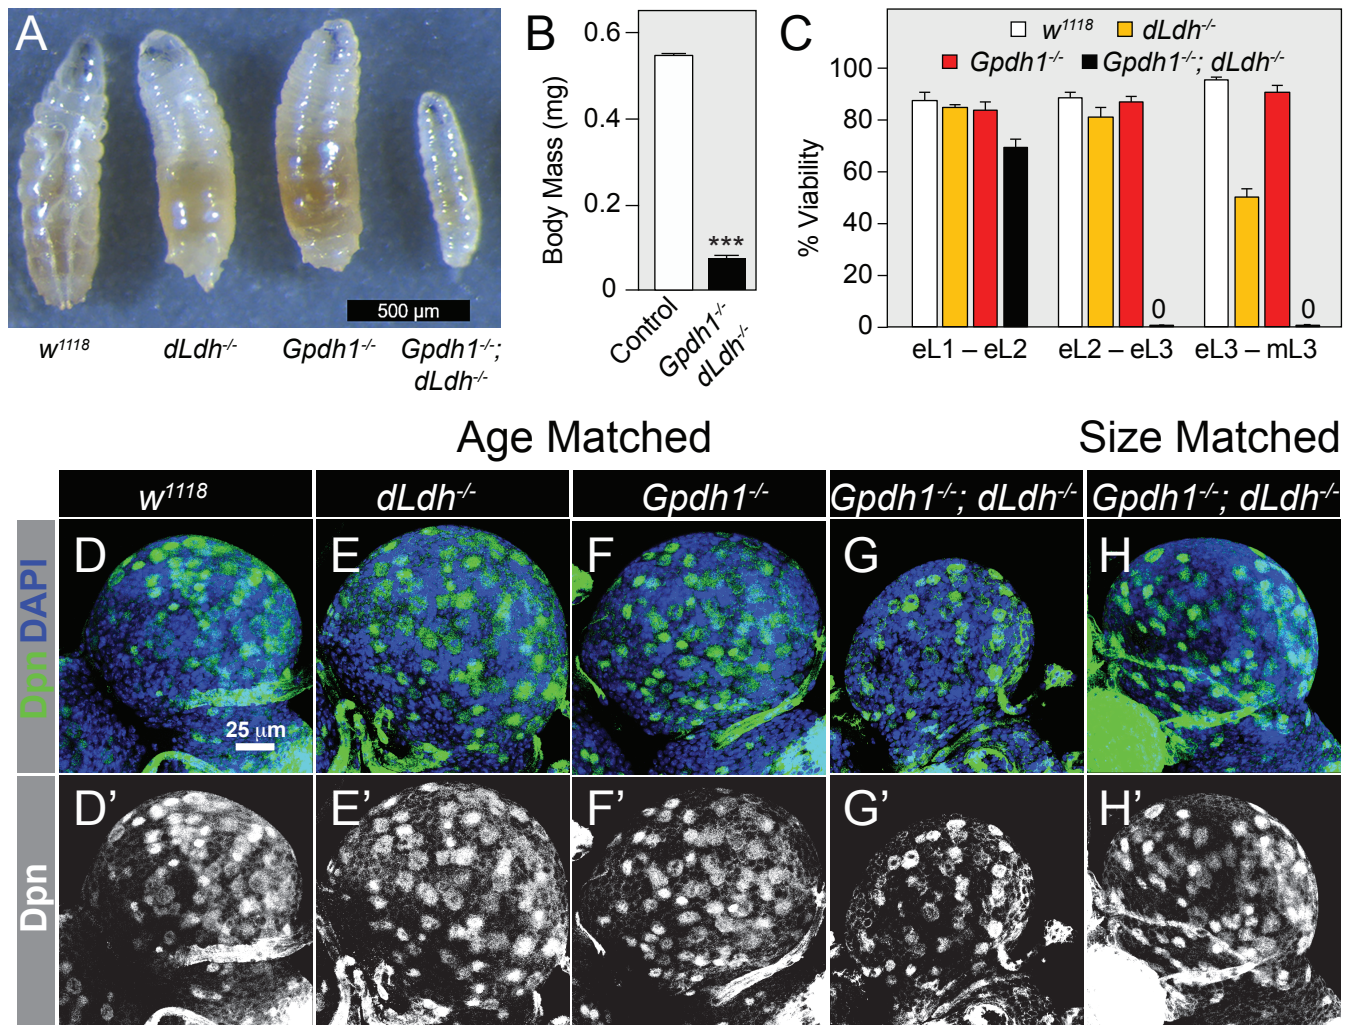

**Figure 4. *Gpdh1*; *dLdh* double mutants exhibit severe growth phenotypes.** (A) Representative images of larvae from synchronized populations of *w<sup>1118</sup>*, *dLdh<sup>16/17</sup>*, *Gpdh1<sup>A10/B18</sup>*, or *Gpdh1<sup>A10/B18</sup>; dLdh<sup>16/17</sup>* double mutants. Note the severe developmental delay exhibited by double mutant larvae. (B) The body mass of *w<sup>1118</sup>* and *Gpdh1<sup>A10/B18</sup>; dLdh<sup>16/17</sup>* double mutant larvae measured 72 hours after egg-laying. (C) The viability of the four genotypes listed in (A) were measured during defined periods of larval development. (B,C) Error bars represent one standard deviation. n=6 samples per genotype. (D-H) Maximum projections of dorsal half of L2 larval brains stained for Dpn (green) and DAPI (blue) from (D) *w<sup>1118</sup>* controls, (E) *dLdh<sup>16/17</sup>* mutants, (F) *Gpdh1<sup>A10/B18</sup>* mutants, (G) age-matched *Gpdh1<sup>A10/B18</sup>; dLdh<sup>16/17</sup>* double mutants, and (H) size-matched *Gpdh1<sup>A10/B18</sup>; dLdh<sup>16/17</sup>* double mutants. The scale bar in (D) applies to (E-H). Note that the (D'-H') display the Dpn channel alone in gray scale. \*\*\**P* < 0.001.



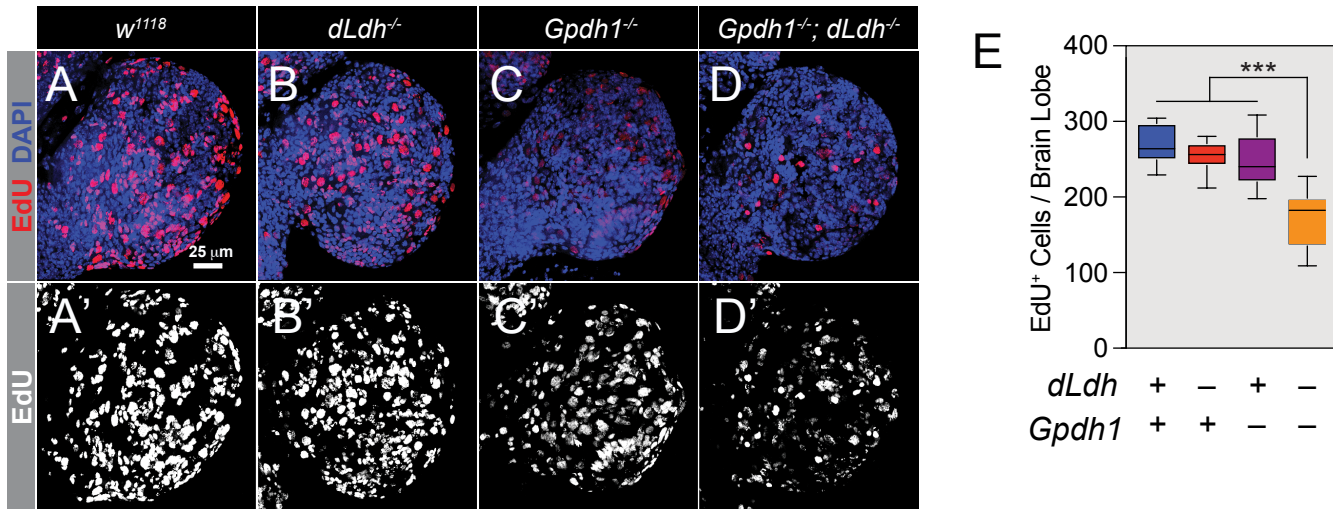

**Figure 5. The DNA replication rate is decreased in brains of *Gpdh1*; *dLdh* double mutants** (A-D) Maximum projections of dorsal half of size-matched L2 larval brains stained for EdU (red) and DAPI (blue) from (A) *w<sup>1118</sup>* controls, (B) *dLdh<sup>16/17</sup>* mutants, (C) *Gpdh1<sup>A10/B18</sup>* mutants, and (D) *Gpdh1<sup>A10/B18</sup>; dLdh<sup>16/17</sup>* double mutants. The scale bar in (A) applies to (A-D). Panels (A'-D') display EdU staining alone in gray scale. (E) Histogram of the number of EdU positive cells per dorsal brain lobe per genotype. For all panels, p-value adjusted for multiple comparisons using the Bonferroni-Dunn method. \*  $P < 0.05$ . \*\* $P < 0.01$ , \*\*\* $P < 0.001$ .

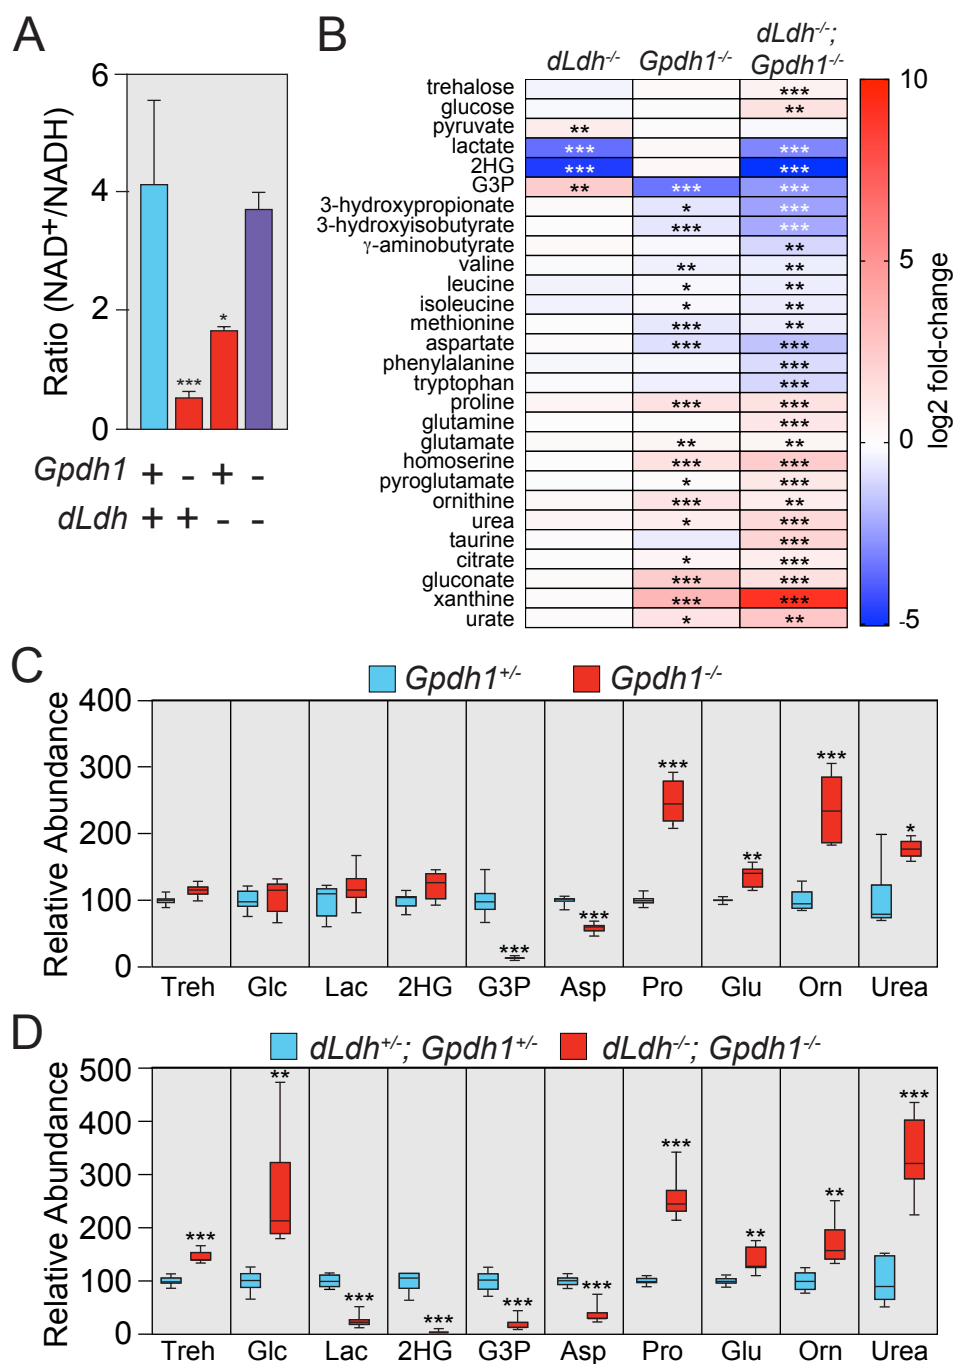

**Figure 6. Amino acid and glucose metabolism are disrupted in *Gpdh1*; *dLdh* double mutants.** (A) The NAD<sup>+</sup>/NADH ratio was measured in *w*<sup>1118</sup>, *dLdh*<sup>16/17</sup>, *Gpdh1*<sup>A10/B18</sup>, and *Gpdh1*<sup>A10/B18</sup>; *dLdh*<sup>16/17</sup> mid-L2 larvae. Error bars represent one standard deviation. n=6 samples per genotype. (B) A heat-map summarizing changes in metabolite abundance in *dLdh*<sup>16/17</sup> mutants relative to *dLdh*<sup>prec</sup> controls, *Gpdh1*<sup>A10/B18</sup> mutants relative to *Gpdh1*<sup>A10/+</sup> controls, and *Gpdh1*<sup>A10/B18</sup>; *dLdh*<sup>16/17</sup> double mutants relative to *Gpdh1*<sup>A10/+</sup>; *dLdh*<sup>16/+</sup> controls. The abundance of select metabolites for either (C) *Gpdh1*<sup>A10/B18</sup> mutants relative to *Gpdh1*<sup>A10/+</sup> controls or (D) *Gpdh1*<sup>A10/B18</sup>; *dLdh*<sup>16/17</sup> double mutants relative to *Gpdh1*<sup>A10/+</sup>; *dLdh*<sup>16/+</sup> are represented as box plots. For all panels, p-value adjusted for multiple comparisons using the Bonferroni-Dunn method. \* *P* < 0.05. \*\**P* < 0.01, \*\*\**P* < 0.001.



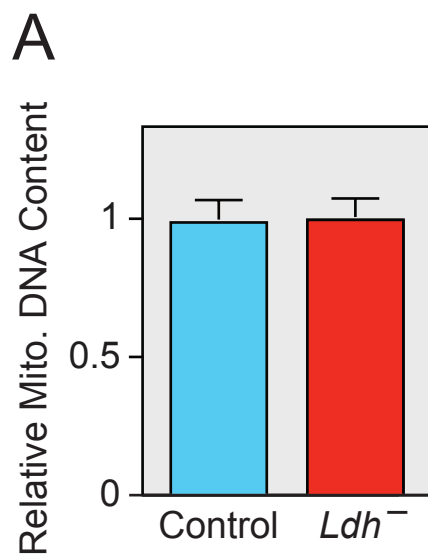

**Supplemental Figure 1. Mitochondrial abundance is unaffected by *dLdh* mutations.**  
(A) The relative abundance of mitochondrial DNA is similar in *dLdh*<sup>prec</sup> controls and *dLdh*<sup>16/17</sup> mutants. Ratio is based on the abundance of *mt::Col* copy number relative to *Rpl32* copy number. Error bars represent standard deviation.

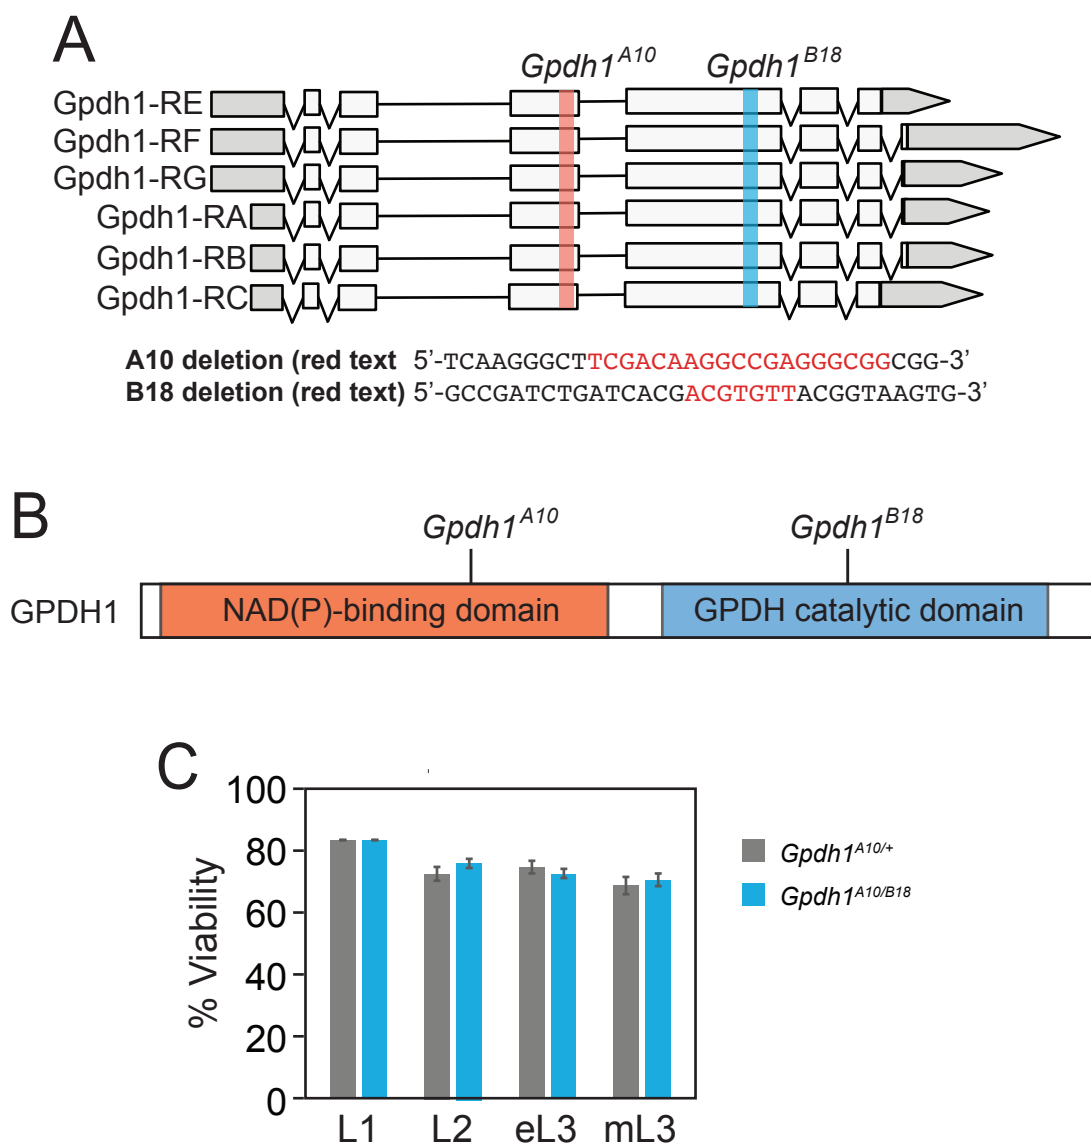

**Supplemental Figure 2. Generation of *Gpdh1* mutants.** (A) A schematic diagram illustrating the *Gpdh1* locus, sequences targeted by guide RNA constructs, and sequence deleted by the *Gpdh1*<sup>A10</sup> and *Gpdh1*<sup>B18</sup> mutations. Deleted bases are highlighted in red. (B) A schematic diagram illustrating the location of the *Gpdh1*<sup>A10</sup> and *Gpdh1*<sup>B18</sup> mutations within the GPDH1 protein. (C) *Gpdh1*<sup>A10/+</sup>, and *Gpdh1*<sup>A10/B18</sup> mutants were analyzed for larval viability. Bars represent the percent of animals that survived from the previous developmental stage until the stage noted on the x-axis. Error bars represent standard deviation. n>100 larvae per timepoint.

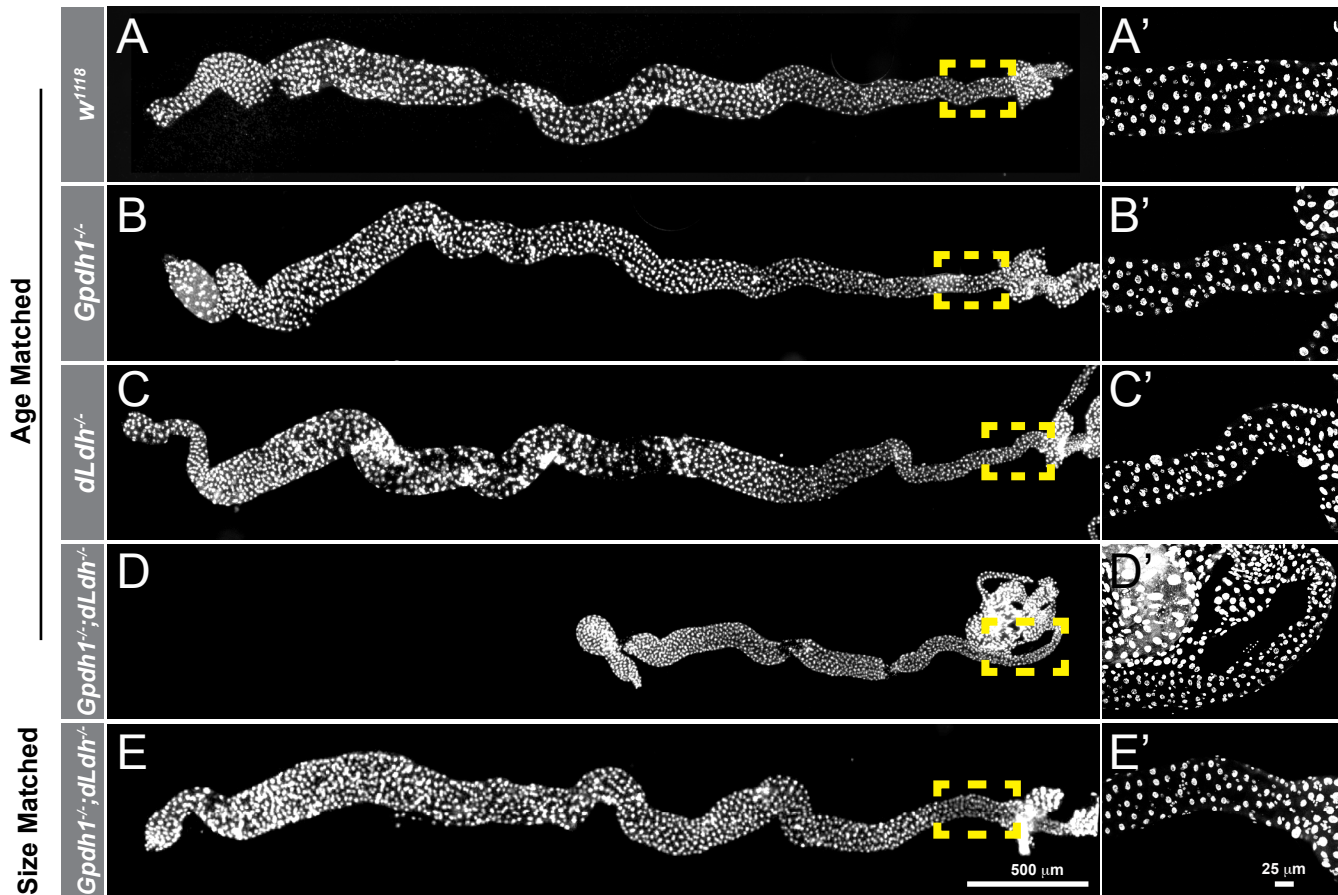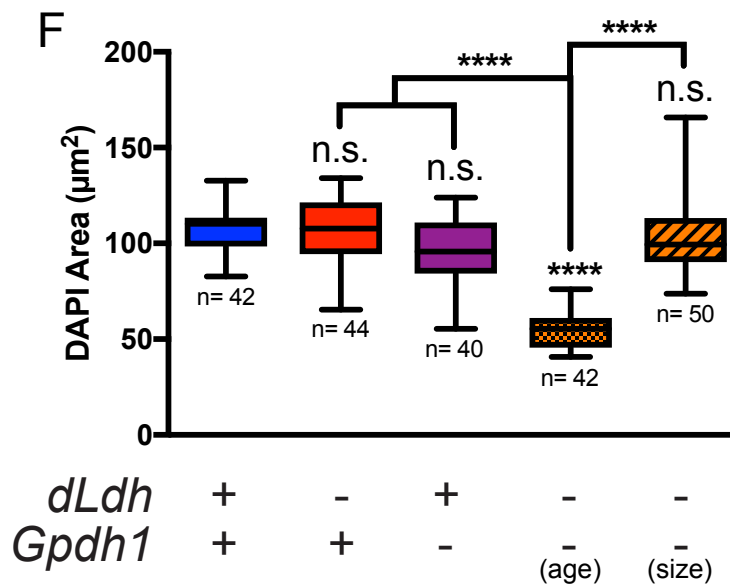

**Supplemental Figure 3. The intestine of *Gpdh<sup>A10/B18</sup>; dLdh<sup>16/17</sup>* double mutant larvae exhibit growth defects and contain smaller cells.** (A-E) L2 larval posterior midguts (PMGs) stained for DAPI (gray) from (A) *w<sup>1118</sup>* controls, (B) *Gpdh1<sup>A10/B18</sup>* mutants, (C) *dLdh<sup>16/17</sup>* mutants, (D) age-matched *Gpdh1<sup>A10/B18</sup>; dLdh<sup>16/17</sup>* double mutants, and (E) size-matched *Gpdh1<sup>A10/B18</sup>; dLdh<sup>16/17</sup>* double mutants. (A'-E') Magnified images of the outlined regions in A-E. The scale bar in (E) and (E') apply to (A-E) and (A'-E'), respectively. (F) Histogram of nuclei size. \*\*\*\* P < 0.0001.

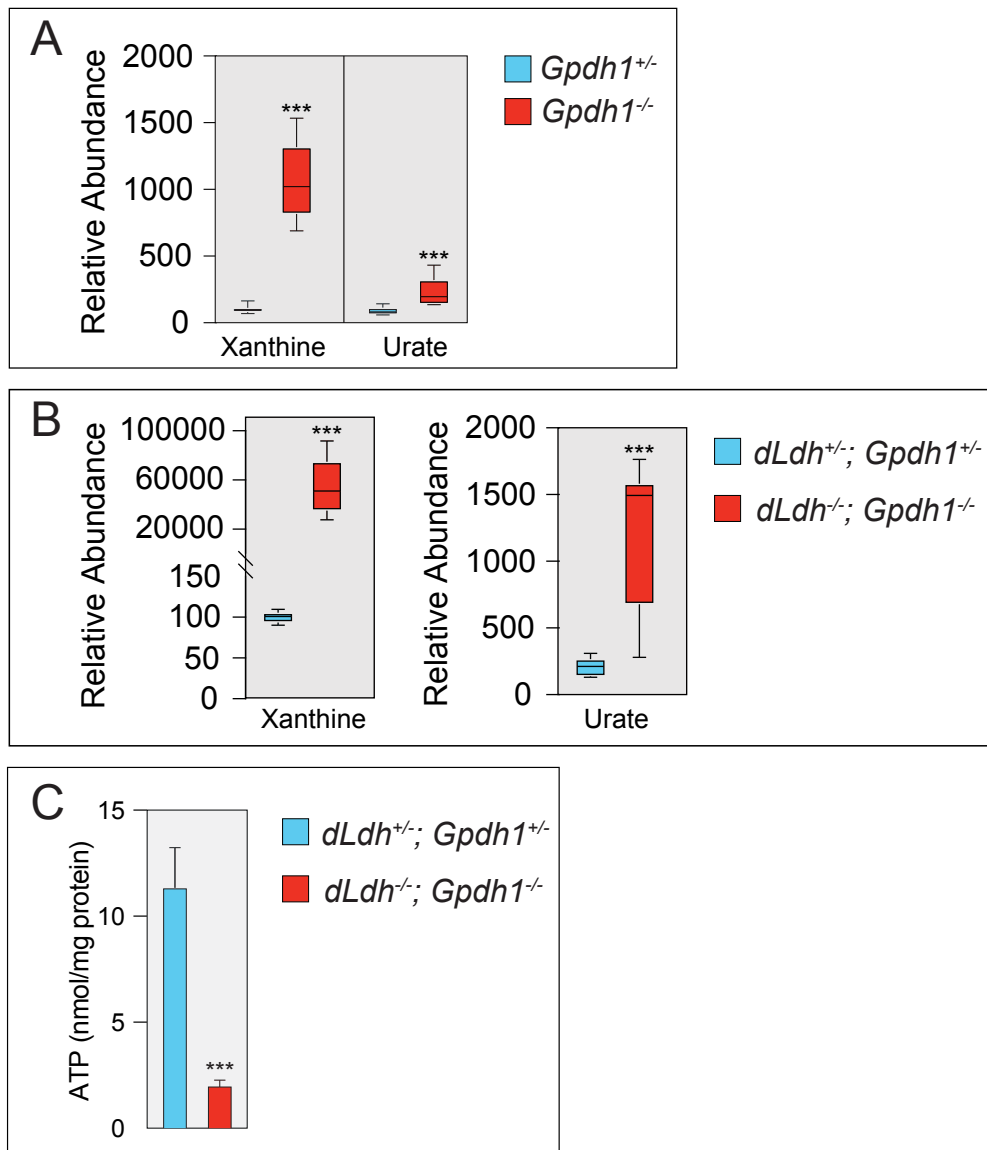

**Supplemental Figure 4. *Gpdh1*; *dLdh* double mutants exhibit significant changes in purine catabolism and ATP production.** GC-MS was used to measure the relative abundance of xanthine and urate in either (A)  $Gpdh1^{A10/B18}$  mutants relative to  $Gpdh1^{A10/+}$  controls or (B)  $Gpdh1^{A10/B18}; dLdh^{16/17}$  double mutants relative to  $Gpdh1^{A10/+}; dLdh^{16/+}$ . (C) ATP levels are significantly decreased in  $Gpdh1^{A10/B18}; dLdh^{16/17}$  double mutants relative to  $Gpdh1^{A10/+}; dLdh^{16/+}$ . \*\*\* $P < 0.001$ .
